1 **Defining the functional significance of intergenic transcribed regions based on**  
2 **heterogeneous features of phenotype genes and pseudogenes**

3

4 John P. Lloyd<sup>1</sup>, Zing Tsung-Yeh Tsai<sup>2</sup>, Rosalie P. Sowers<sup>3</sup>, Nicholas L. Panchy<sup>4</sup>, Shin-Han  
5 Shiu<sup>1,4,5\*</sup>

6 <sup>1</sup> Department of Plant Biology, Michigan State University, East Lansing, MI 48824, USA

7 <sup>2</sup> Department of Computational Medicine and Bioinformatics, University of Michigan, Ann  
8 Arbor, MI 48109, USA

9 <sup>3</sup> Department of Biochemistry and Molecular Biology, Pennsylvania State University, University  
10 Park, PA 16802, USA

11 <sup>4</sup> Genetics Program, Michigan State University, East Lansing, MI 48824, USA

12 <sup>5</sup> Ecology, Evolutionary Biology, and Behavior Program, Michigan State University, East  
13 Lansing, MI 48824, USA

14 \* To whom correspondence should be addressed.

15

16 *Correspondence to:*

17 Shin-Han Shiu

18 Michigan State University

19 E-mail: shius@msu.edu

20 Telephone number: 517-353-7196

21

22 Running title: Functionality of intergenic transcripts

23

24 Keywords: Intergenic transcription, ncRNAs, definition of function, molecular evolution,  
25 machine learning, data integration

26

27

28 **ABSTRACT**

29 With advances in transcript profiling, the presence of transcriptional activities in intergenic  
30 regions has been well established in multiple model systems. However, whether intergenic  
31 expression reflects transcriptional noise or the activity of novel genes remains unclear. We  
32 identified intergenic transcribed regions (ITRs) in 15 diverse flowering plant species and found  
33 that the amount of intergenic expression correlates with genome size, a pattern that could be  
34 expected if intergenic expression is largely nonfunctional. To further assess the functionality of  
35 ITRs, we first built machine learning classifiers using *Arabidopsis thaliana* as a model that can  
36 accurately distinguish functional sequences (phenotype genes) and nonfunctional ones  
37 (pseudogenes and unexpressed intergenic regions) by integrating 93 biochemical, evolutionary,  
38 and sequence-structure features. Next, by applying the models genome-wide, we found that  
39 4,427 ITRs (38%) and 796 annotated ncRNAs (44%) had features significantly similar to  
40 benchmark protein-coding or RNA genes and thus were likely parts of functional genes.  
41 However, ~60% of ITRs and ncRNAs were more similar to nonfunctional sequences and should  
42 be considered transcriptional noise unless falsified with experiments. The predictive framework  
43 established here provides not only a comprehensive look at how functional, genic sequences are  
44 distinct from likely nonfunctional ones, but also a new way to differentiate novel genes from  
45 genomic regions with noisy transcriptional activities.

46

## 47 INTRODUCTION

48 Advances in sequencing technology have helped to identify pervasive transcription in intergenic  
49 regions with no annotated genes. These intergenic transcripts have been found in metazoa and  
50 fungi, including *Homo sapiens* (human; ENCODE Project Consortium 2012), *Drosophila*  
51 *melanogaster* (Brown et al. 2014), *Caenorhabditis elegans* (Boeck et al. 2016), and  
52 *Saccharomyces cerevisiae* (Nagalakshmi et al. 2008). In plants, ~7,000 and ~15,000 intergenic  
53 transcripts have also been reported in *Arabidopsis thaliana* (Yamada et al. 2003; Stolc et al.  
54 2005; Moghe et al. 2013; Krishnakumar et al. 2015) and *Oryza sativa* (Nobuta et al. 2007),  
55 respectively. The presence of intergenic transcripts indicates that there may be additional genes  
56 in genomes that have escaped gene finding efforts thus far. Knowledge of the complete suite of  
57 functional elements present in a genome is an important goal for large-scale functional genomics  
58 efforts and the quest to connect genotype to phenotype. Thus the identification of functional  
59 intergenic transcribed regions (ITRs) represents a fundamental task that is critical to our  
60 understanding of the gene space in a genome.

61 Loss-of-function study represents the gold standard by which the functional significance  
62 of genomic regions, including ITRs, can be confirmed (Niu and Jiang 2013). In *Mus musculus*  
63 (mouse), at least 25 ITRs with loss-of-function mutant phenotypes have been identified  
64 (Sauvageau et al. 2013; Lai et al. 2015), indicating that they are *bona fide* genes. In addition,  
65 loss-of-function mutants have been used to confirm ITR functionality in mouse embryonic stem  
66 cell proliferation (Ivanova et al. 2006; Guttman et al. 2009) and male reproductive development  
67 (Heinen et al. 2009), as well as brain and eye development in *Danio rerio* (Ulitsky et al. 2011).  
68 In human, 162 long intergenic non-coding RNAs harbor phenotype-associated SNPs, suggesting  
69 that these expressed intergenic regions may be functional (Ning et al. 2013). In addition to  
70 intergenic expression, most model organisms feature an abundance of annotated non-coding  
71 RNA (ncRNA) sequences (Zhao et al. 2016), which are mostly identified through the presence of  
72 expression occurring outside of annotated genes. Thus, the only difference between ITRs and  
73 most ncRNA sequences is whether or not they have been annotated. Similar to the ITR examples  
74 above, a small number of ncRNAs have been confirmed as functional through loss-of-function  
75 experimental characterization, including but not limited to *Xist* in mouse (Penny et al. 1996;  
76 Marahrens et al. 1997), *Malat1* in human (Bernard et al. 2010), *bereft* in *D. melanogaster*  
77 (Hardiman et al. 2002), and *At4* in *A. thaliana* (Shin et al. 2006). However, despite the presence

78 of a few notable examples, the number of ITRs and ncRNAs with well-established functions is  
79 dwarfed by those with no known function.

80 While some ITRs and ncRNAs are likely novel genes, intergenic transcription may also  
81 be the byproduct of noisy expression that can occur due to nonspecific landing of RNA  
82 Polymerase II (RNA Pol II) or spurious regulatory signals that drive expression in random  
83 genomic regions (Struhl 2007). Thus, whether an intergenic transcript is considered functional  
84 cannot depend solely on the fact that it is expressed. In addition to being biochemically active,  
85 the genomic region must be under selection. This line of logic has revived the classical ideas on  
86 differentiating “causal role” and “selected effect” functionality (Doolittle et al. 2014). A “causal  
87 role” definition requires a definable activity to consider a genomic region as functional  
88 (Cummins 1975; Amundson and Lauder 1994), which is adopted by the ENCODE Consortium  
89 (2012) to classify ~80% of the human genome as having biochemical functions. This finding has  
90 been used as evidence to disprove the presence of junk DNA that is not under natural selection  
91 (see Eddy 2013). This has drawn considerable critique because biochemical activity itself is not  
92 an indication of selection (Graur et al., 2013; Niu and Jiang, 2013). Instead, selected effect  
93 functionality is advocated to be a more suitable definition for a genomic region with discernible  
94 activity (Amundson and Lauder 1994; Graur et al., 2013; Doolittle et al. 2014). Under the  
95 selected effect functionality definition, ITRs and most annotated ncRNA genes remain  
96 functionally ambiguous.

97 Functional ITRs represent genic sequences that have not been identified with  
98 conventional gene finding programs. Such programs incorporate sequence characteristics,  
99 transcriptional evidence, and conservation information to define genic regions that are expected  
100 to be functional. Thus, genes that lack the features typically associated with genic regions remain  
101 unidentified. Due to the debate on the definitions of function post-ENCODE, Kellis et al. (2014)  
102 suggested that evolutionary, biochemical, and genetic evidences provide complementary  
103 information to define functional genomic regions. Integration of chromatin accessibility,  
104 transcriptome, and conservation evidence was successful in identifying regions in the human  
105 genome that are under selection (Gulko et al. 2014). Moreover, a comprehensive integration of  
106 biochemical, evolutionary, and genetic evidence resulted in highly accurate identification of  
107 human disease genes and pseudogenes (Tsai et al. 2017). However, it is not known if such  
108 predictions are possible or if the features that define functional genomic regions in human are

109 applicable in other species. In plants, even though many biochemical signatures are known to be  
110 associated with genic regions, these signatures have not been incorporated to assist in identifying  
111 the functional genomic regions.

112 To investigate the functionality of intergenic transcription, we first identified ITRs in 15  
113 flowering plant species with 17-fold genome size differences and evaluated the relationship  
114 between the prevalence of intergenic expression and genome size. Next, we determined whether  
115 93 evolutionary, biochemical, and sequence-structure features could distinguish functional  
116 sequences (phenotype genes) and nonfunctional ones (pseudogenes) using *A. thaliana* as a  
117 model. We then jointly considered all 93 features to establish functional gene prediction models  
118 using machine learning methods. Finally, we applied the models to ITRs and annotated ncRNAs  
119 to determine whether these functionally ambiguous sequences are more similar to known  
120 functional or likely nonfunctional sequences.

## 121 **RESULTS & DISCUSSION**

### 122 **Relationship between genome size and intergenic expression indicates that intergenic** 123 **transcripts may generally be nonfunctional**

124 Transcription of an unannotated, intergenic region could be due to nonfunctional transcriptional  
125 noise or the activity of a novel gene. If noisy transcription occurs due to random landing of RNA  
126 Pol II or spurious regulatory signals, a naïve expectation is that, as genome size increases, the  
127 amount of intergenic expression would increase accordingly. By contrast, we expect that the  
128 extent of expression for genic sequences will not be significantly correlated with genome size  
129 because larger plant genomes do not necessarily have more genes ( $r^2=0.01$ ;  $p=0.56$ ; see  
130 Methods). Thus, to gauge if intergenic transcribed regions (ITRs) generally behave more like  
131 what we expect of noisy or genic transcription, we assessed the correlation between genome size  
132 and the amount of intergenic expression occurring within 15 flowering plant species.

133 We first identified genic and intergenic transcribed regions using leaf transcriptome data  
134 from 15 flowering plants with 17-fold differences in genome size (Supplemental Table 1).  
135 Identical numbers of RNA-sequencing (RNA-seq) reads (30 million) and the same mapping  
136 procedures were used in all species to facilitate cross-species comparisons (see Methods).  
137 Transcribed regions were considered as ITRs if they did not overlap with any gene annotation  
138 and had no significant translated sequence similarity to plant protein sequences. As expected, the

139 amount of expression originating from annotated genic regions had no significant correlation  
140 with genomes size ( $r^2=0.03$ ;  $p=0.53$ ; **Fig. 1A**). In contrast, the amount of intergenic expression  
141 occurring was significantly and positively correlated ( $r^2=0.30$ ;  $p=0.04$ ; **Fig. 1B**). Because more  
142 intergenic expression is occurring in species with more genome space, this is consistent with the  
143 interpretation that a significant proportion of intergenic expression represents transcriptional  
144 noise. However, the correlation between genome size and intergenic expression explained ~30%  
145 of the variation (**Fig. 1B**), suggesting that other factors also affect ITR content, including the  
146 possibility that some ITRs are truly functional, novel genes. To further evaluate the functionality  
147 of intergenic transcripts, we next identified the biochemical and evolutionary features of  
148 functional genic regions and tested whether intergenic transcripts in *A. thaliana* were more  
149 similar to functional or nonfunctional sequences.

### 150 **Expression, conservation, and epigenetic features are significantly distinct between** 151 **benchmark functional and nonfunctional genomic sequences**

152 To determine whether intergenic transcripts resemble functional sequences, we first asked what  
153 features allow benchmark functional and nonfunctional genomic regions to be distinguished. For  
154 benchmark functional sequences, we used genes with visible loss-of-function phenotypes when  
155 mutated (referred to as phenotype genes,  $n=1,876$ ; see Methods). These phenotype genes were  
156 considered functional based on the selected effect functionality criterion (Neander 1991) because  
157 their mutations have significant growth and/or developmental impact and likely contribute to  
158 reduced fitness. For benchmark nonfunctional genomic regions, we utilized pseudogene  
159 sequences ( $n=761$ ; see Methods). These pseudogenes exhibit sequence similarity to known  
160 genes, but harbor disabling mutations, including frame shifts and/or in-frame stop codons, that  
161 result in the production of presumably nonfunctional protein products. Considering that only 2%  
162 of pseudogenes are maintained over 90 million years of divergence between human and mouse  
163 (Svensson et al. 2006), it is expected that the majority of pseudogenes are no longer under  
164 selection (Li et al. 1981).

165 We evaluated 93 gene or gene product features for their ability to distinguish between  
166 phenotype genes and pseudogenes. These features were grouped into seven categories, including  
167 chromatin accessibility, DNA methylation, histone 3 (H3) marks, sequence conservation,  
168 sequence-structure, transcription factor (TF) binding, and transcription activity. Feature values

169 (Supplemental Table 2) were calculated for a randomly-selected 500 base pair (bp) window  
170 inside a phenotype gene or pseudogene. We used Area Under the Curve - Receiver Operating  
171 Characteristic (AUC-ROC) as a metric to measure how well a feature distinguishes between  
172 phenotype genes and pseudogenes. AUC-ROC values range between 0.5 (random guessing) and  
173 1 (perfect separation of functional and nonfunctional sequences), with AUC-ROC values of 0.7,  
174 0.8, and 0.9 considered fair, good, and excellent performance, respectively. Among the seven  
175 feature categories, transcription activity features were highly informative (median AUC-  
176 ROC=0.88; **Fig. 2A**). Sequence conservation, DNA methylation, TF binding, and H3 mark  
177 features were also fairly distinct between phenotype genes and pseudogenes (median AUC-ROC  
178 ~ 0.7 for each category; **Fig. 2B-E**). By contrast, chromatin accessibility and sequence-structure  
179 features were largely uninformative (median AUC-ROC=0.51 and 0.55, respectively; **Fig.**  
180 **2F,G**). The poor performance of chromatin accessibility features is likely because the DNase I  
181 hypersensitive site (DHS) datasets were sparse, as only 2-6% of phenotype gene and pseudogene  
182 sequences overlapped a DHS peak. Further, median nucleosome occupancy of phenotype genes  
183 (median normalized nucleosome occupancy = 1.22) is only slightly lower than that of  
184 pseudogenes (median = 1.31; Mann Whitney U test,  $p < 2e-4$ ). For sequence-structure features  
185 based on dinucleotide structures (see Methods), we found that poor performance was likely due  
186 to phenotype genes and pseudogenes sharing similar dinucleotide sequence compositions  
187 ( $r^2=0.99$ ,  $p<3e-16$ ).

### 188 **Error rates for functional region predictions are high when only single features are** 189 **considered**

190 Within each feature category, there was a wide range of performance between features (**Fig. 2**,  
191 Supplemental Table 3) and there were clear biological or technical explanations for features that  
192 perform poorly. For the transcription activity category, 17 out of 24 features had an AUC-ROC  
193 performance >0.8, including the best-performing feature, expression breadth (AUC-ROC=0.95;  
194 **Fig. 2A**). However, five transcription activity-related features performed poorly (AUC-  
195 ROC<0.65), including the presence of expression (transcript) evidence (AUC-ROC=0.58; **Fig.**  
196 **2A**). This is because 80% of pseudogenes were considered expressed in  $\geq 1$  of 51 RNA-seq  
197 datasets, demonstrating that presence of transcripts should not be used by itself as evidence of  
198 functionality. For the sequence conservation category, maximum and average phastCons

199 conservation scores were highly distinct between phenotype genes and pseudogenes (AUC-  
200 ROC=0.83 and 0.82, respectively; **Fig. 2B**). On the other hand, identity to best matching  
201 nucleotide sequences found in *Brassicaceae* and algal species were not informative (AUC-  
202 ROC=0.55 and 0.51, respectively; **Fig. 2B**). This was because 99.8% and 95% of phenotype  
203 genes and pseudogenes, respectively, had a potentially homologous sequence within the  
204 *Brassicaceae* family, and only 3% and 1%, respectively, in algal species. Thus, *Brassicaceae*  
205 genomes were too similar and algal genomes too dissimilar to *A. thaliana* to provide meaningful  
206 information. H3 mark features also displayed high variability. The most informative H3 mark  
207 features were based on the number and coverage of activation-related marks (AUC-ROC=0.87  
208 and 0.85, respectively; **Fig. 2E**), consistent with the notion that histone marks are often jointly  
209 associated with active genomic sequences to provide a robust regulatory signal (Schreiber and  
210 Bernstein 2002; Wang et al. 2008). By comparison, the coverage and intensity of H3 lysine 27  
211 trimethylation (H3K27me3) and H3 threonine 3 phosphorylation (H3T3ph) were largely  
212 indistinct between phenotype genes and pseudogenes (AUC-ROC range: 0.55-0.59; **Fig. 2E**).

213 Despite this high variability in performance, some features and feature categories had  
214 high AUC-ROCs, suggesting that these features may individually provide sufficient information  
215 for distinguishing between functional and nonfunctional genomic regions. To assess this  
216 possibility, we next evaluated the error rates of function predictions based on single features. We  
217 first considered expression breadth of a sequence, the best predicting feature of functionality.  
218 Despite high AUC-ROC (0.95), the false positive rate (FPR; % of pseudogenes predicted as  
219 phenotype genes) was 21% when only expression breadth was used, while the false negative rate  
220 (FNR; % of phenotype genes predicted as pseudogenes) was 4%. Similarly, the best-performing  
221 H3 mark- and sequence conservation-related features had FPRs of 26% and 32%, respectively,  
222 and also incorrectly classified at least 10% of phenotype genes as pseudogenes. Thus, error rates  
223 are high even when considering well-performing single features, indicating the need to jointly  
224 consider multiple features for distinguishing phenotype genes and pseudogenes.

### 225 **Consideration of multiple features in combination produces accurate predictions of** 226 **functional genomic regions**

227 To consider multiple features in combination, we first conducted principle component (PC)  
228 analysis to investigate how well phenotype genes and pseudogenes could be separated. Between



229 the first two PCs, which jointly explain 40% of the variance in the feature dataset, phenotype  
230 genes (**Fig. 3A**) and pseudogenes (**Fig. 3B**) were distributed in largely distinct space. However,  
231 there remains substantial overlap, indicating that standard parametric approaches are not well  
232 suited to distinguishing between benchmark functional and nonfunctional sequences. Thus, we  
233 instead considered all 93 features for phenotype gene and pseudogenes in combination using  
234 random forest (referred to as the full model; see Methods). The phenotype gene and pseudogene  
235 sequences and associated conservation, biochemical, and sequence-structure features were  
236 separated into distinct training and testing sets and the full model was generated and validated  
237 using independent data subsets (cross-validation). The full model provided more accurate  
238 predictions (AUC-ROC=0.98; FNR=4%; FPR=10%; **Fig. 3C**) than any individual feature (**Fig.**  
239 **2**; Supplemental Table 3). An alternative measure of performance based on the precision  
240 (proportion of predicted functional sequences that are truly functional) and recall (proportion of  
241 truly functional sequences predicted correctly) values among predictions generated by the full  
242 model also indicated that the model was performing well (**Fig. 3D**). When compared to the best-  
243 performing single feature (expression breadth), the full model had a similar FNR but half the  
244 FPR (10% compared to 21%). Thus, the full model is highly capable of distinguishing between  
245 phenotype genes and pseudogenes.

246 We next determined the relative contributions of different feature categories in predicting  
247 phenotype genes and pseudogenes and whether models based on a subset of features would  
248 perform similarly as the full model. Seven prediction models were established, each using only  
249 the subset of features from a single category (**Fig. 2**). Although none of these category-specific  
250 models had performance as high as the full model, the models based on transcription activity,  
251 sequence conservation, and H3 mark features scored highly (AUC-ROC=0.97, 0.92, and 0.91,  
252 respectively; **Fig. 3C**). Particularly, the transcription activity feature category model performed  
253 almost as well as the full model (FNR=6%, FPR=12%). We emphasize that the breadth and level  
254 of transcription are the causes of the strong performance of the transcription activity-only model,  
255 not the presence of expression evidence.

256 To evaluate whether the strong performance of the full model is being driven solely by  
257 transcription activity-related features, we also built a function prediction model did not consider  
258 these features (full (-TX), **Fig. 3C,D**). We found that the model excluding transcription activity  
259 features performed almost as well as the full model and similarly to the transcription activity-

260 feature-only model, but with an increased FPR (AUC-ROC=0.96; FNR=3%; FPR=20%). This  
261 indicates that predictions of functional regions are not reliant solely on transcription data.  
262 Instead, a diverse array of features can be considered to make highly accurate predictions of the  
263 functionality of a genomic sequence. Meanwhile, our finding of the high performance of the  
264 transcription activity-only model highlights the possibility of establishing an accurate model for  
265 distinguishing functional genic and nonfunctional genomic sequences in plant species with only  
266 a modest amount of transcriptome data.

### 267 **Functional likelihood allows the prediction of functional and nonfunctional genomic** 268 **regions**

269 To provide a measure of the potential functionality of any sequence in the *A. thaliana* genome,  
270 including ITRs and ncRNAs, we utilized the confidence score from the full model as a  
271 “functional likelihood” value (Tsai et al. 2017; see Methods). The functional likelihood (FL)  
272 score ranges between 0 and 1, with high values indicating that a sequence is more similar to  
273 phenotype genes (functional) and low values indicating a sequence more closely resembles  
274 pseudogenes (nonfunctional). FL values for all genomic regions examined in this study are  
275 available in Supplemental Table 4. As expected, phenotype genes had high FL values  
276 (median=0.97; **Fig. 4A**) and pseudogenes had low values (median=0.01; **Fig. 4B**). To call  
277 sequences as functional or not, we defined a threshold FL value of 0.35 (see Methods). Using  
278 this threshold, 96% of phenotype genes (**Fig. 4A**) and 90% of pseudogenes (**Fig. 4B**) are  
279 correctly classified as functional and nonfunctional, respectively, demonstrating that the full  
280 model is highly capable of distinguishing functional and nonfunctional sequences.

281 We next applied our model to predict the functionality of annotated protein-coding genes,  
282 transposable elements, and unexpressed intergenic regions. Most annotated protein-coding genes  
283 not included in the phenotype gene dataset had high FL scores (median=0.86; **Fig. 4C**) and 80%  
284 were predicted as functional. Of the 20% of protein-coding genes that were predicted as  
285 nonfunctional, we expect that at least 4% represent false negatives based on the FNR of the full  
286 model. The actual FNR among protein-coding genes may be higher, however, as phenotype  
287 genes represent a highly active and well conserved subset of all genes. However, a subset of the  
288 low-scoring protein-coding genes may also represent gene sequences undergoing functional  
289 decay and *en route* to pseudogene status. To assess this possibility, we examined 1,940 *A.*

290 *thaliana* "decaying" genes that may be experiencing pseudogenization due to promoter  
291 disablement (Yang et al. 2011) and found that, while these decaying genes represented only 7%  
292 of all *A. thaliana* annotated protein-coding genes, they made up 45% of protein-coding genes  
293 predicted as nonfunctional (Fisher's Exact Test (FET),  $p < 1E-11$ ). In addition to protein-coding  
294 genes, we evaluated the FLs of transposable elements (TEs) and randomly-selected, unexpressed  
295 intergenic regions that are most likely nonfunctional. As expected, the FLs were low for both  
296 TEs (median=0.03, **Fig. 4D**) and unexpressed intergenic regions (median=0.07; **Fig. 4E**), and  
297 99% of TEs and all unexpressed intergenic sequences were predicted as nonfunctional, further  
298 demonstrating the utility of the function prediction model. Overall, the FL measure provides a  
299 useful metric to distinguish between phenotype genes and pseudogenes. In addition, the FLs of  
300 annotated protein-coding genes, TEs, and unexpressed intergenic sequences agree with *a priori*  
301 expectations regarding the functionality of these sequences.

### 302 **Exclusion of features from multiple tissues increases prediction performance for narrowly-** 303 **expressed sequences**

304 Although the full model performs exceedingly well, there remain false predictions. There are 76  
305 phenotype genes (4%) predicted as nonfunctional (referred to as low-FL phenotype genes). We  
306 assessed why these phenotype genes were not correctly identified by first asking what category  
307 of features were particularly distinct between low-FL and the remaining phenotype genes. We  
308 found that the major category that led to the misclassification of phenotype genes was  
309 transcription activity, as only 7% of low-scoring phenotype genes were predicted as functional in  
310 the transcription activity-only model, compared to 98% of high FL phenotype genes (**Fig. 5**). By  
311 contrast, >65% of low-FL phenotype genes were predicted as functional when sequence  
312 conservation, H3 mark, or DNA methylation features were used. This could suggest that the full  
313 model is less effective in predicting functional sequences that are weakly or narrowly expressed.  
314 While sequence conservation features are distinct between functional and nonfunctional  
315 sequences when considered in combination, a significantly higher proportion of low-FL  
316 phenotype genes were specific to the *Brassicaceae* family, with only 33% present in  
317 dicotyledonous species outside of the *Brassicaceae*, compared to 78% of high-scoring phenotype  
318 genes (FET,  $p < 4e-12$ ), thus our model likely has reduced power in detecting lineage-specific  
319 genes.

320           Given the association between transcription activity features and functional predictions,  
321 we next investigated how functional predictions performed for conditionally-functional and  
322 narrowly-expressed sequences. We found that genes with conditional phenotypes (see Methods)  
323 had no significant differences in FLs (median=0.96) as those with phenotypes under standard  
324 growth conditions (median=0.97; U test,  $p=0.38$ , Supplemental Fig. 1A). Thus, our model can  
325 capture conditionally functional sequences. Next, we evaluated FL distributions among  
326 sequences with different breadths of gene expression. For this comparison, we focused on non-  
327 stress, single-tissue expression datasets (Supplemental Table 5), which was distinct from the  
328 expression breadth feature in the prediction model that considered all datasets. While phenotype  
329 genes were better predicted than pseudogenes among sequences with the same number of tissues  
330 with expression evidence (U tests, all  $p < 1.7E-06$ ; Supplemental Fig. 1B), 65% of the 62  
331 phenotype genes expressed in  $\leq 3$  tissues were predicted as nonfunctional. Further, there was a  
332 significant correlation between the number of tissues with expression evidence and FL values of  
333 all sequences in our analysis ( $r^2=0.77$ ;  $p < 2E-16$ ). Thus, the function prediction model is biased  
334 against narrowly-expressed phenotype genes.

335           We also found that 80 pseudogenes (10%) were defined as functional (high-FL  
336 pseudogenes). Consistent with misclassifications among phenotype genes, a key difference  
337 between high-FL pseudogenes and those that were correctly predicted as nonfunctional was that  
338 high-FL pseudogenes were more highly and broadly expressed (**Fig. 5**). A significantly higher  
339 proportion of high-FL pseudogenes came from existing genome annotation as 19% of annotated  
340 pseudogenes were classified as functional, compared to 4% of pseudogenes identified through a  
341 computational pipeline (Zou et al 2009) (FET,  $p < 1.5E-10$ ). We found that high-FL pseudogenes  
342 might be more recently pseudogenized and thus have not yet lost many genic signatures, as the  
343 mean number of disabling mutations (premature stop or frameshift) per kb in high-scoring  
344 pseudogenes (1.9) were significantly lower than that of low-scoring pseudogenes (4.0; U test,  $p <$   
345  $0.02$ ). Lastly, we cannot rule out the possibility that a small subset of high-scoring pseudogenes  
346 represent truly functional sequences, rather than false positives (e.g. Poliseno et al. 2010; Karreth  
347 et al. 2015). Overall, the misclassification of both narrowly-expressed phenotype genes and  
348 broadly-expressed pseudogenes highlights the need for an updated prediction model that is less  
349 influenced by expression breadth.

350 To tailor functional predictions to narrowly-expressed sequences, we generated a “tissue-  
351 agnostic” model that attempts to minimize the contribution of biochemical activities occurring in  
352 many tissues by excluding expression breadth and features that were available across multiple  
353 tissues (see Methods). The tissue-agnostic model performed similarly to the full model (AUC-  
354 ROC=0.97; FNR=4%; FPR=15%; Supplemental Fig. 2; Supplemental Table 4). Importantly, the  
355 proportion of phenotype genes expressed in  $\leq 3$  tissues predicted as functional increased by 23%  
356 (35% in the full model to 58% in the tissue-agnostic model, Supplemental Fig. 1C), indicating  
357 that the tissue-agnostic model is more suitable for predicting the functionality of narrowly-  
358 expressed sequences than the full model, although there was an increase in FPR (from 10% to  
359 15%). We next sought to evaluate the FL of ITR and annotated ncRNA sequences utilizing both  
360 the full model and the tissue-agnostic model, as these sequences were often narrowly-expressed  
361 (Supplemental Fig. 3A).

### 362 **Intergenic transcribed regions and annotated ncRNAs are mostly predicted as** 363 **nonfunctional**

364 A subset of ITRs and ncRNAs likely represent novel genes or unannotated exon extensions of  
365 known genes (Johnson et al. 2005; Moghe et al. 2013). Nevertheless, most ITRs and ncRNAs are  
366 functionally ambiguous, as they are predominantly identified by the presence of expression  
367 evidence and few have been characterized genetically. To evaluate the functionality of ITRs and  
368 ncRNAs, we applied both the full and tissue-agnostic models to 895 ITRs, 136 TAIR ncRNAs,  
369 and 252 Araport long ncRNAs (referred to as Araport ncRNAs; see Methods). The median FLs  
370 based on the full model were low (0.09) for both ITRs (**Fig. 4F**) and Araport ncRNAs (**Fig. 4G**),  
371 and only 15% and 9% of these sequences were predicted as functional, respectively. By contrast,  
372 TAIR ncRNAs had a significantly higher median FL value (0.53; U tests, both  $p < 5e-31$ ; **Fig.**  
373 **4H**) and 68% were predicted as functional. The higher proportion of functional TAIR ncRNA  
374 predictions compared to ITRs and Araport ncRNAs could be best explained by differences in  
375 features from the transcription activity category (**Fig. 5**). We also note that a greater proportion  
376 of ITRs and Araport ncRNAs are predicted as functional when considering only DNA  
377 methylation or H3 mark features (**Fig. 5**). However, these two category-specific models also had  
378 higher false positive rates (unexpressed intergenic sequences and pseudogenes, **Fig. 5**). Thus,

379 single feature models do not provide additional support for the functionality of most Araport  
380 ncRNAs and ITRs.

381 We next applied the tissue-agnostic model that is less biased against narrowly-expressed  
382 sequences (Supplemental Fig. 1C) to ITRs and TAIR/Araport ncRNAs that were generally  
383 narrowly-expressed (Supplemental Fig. 3A). Compared to the full model, around twice as many  
384 ITRs (30%) and Araport ncRNAs (19%) but a similar number of TAIR ncRNA (67%) were  
385 predicted as functional. Considering the union of the full and tissue-agnostic model predictions,  
386 268 ITRs (32%), 57 Araport ncRNAs (23%), and 105 TAIR ncRNAs (77%) were likely  
387 functional. ITRs and annotated ncRNAs closer to annotated genes tended to be predicted as  
388 functional (Supplemental Fig. 4A). Using the 95<sup>th</sup> percentile of intron lengths for all genes as a  
389 threshold to call ITRs and annotated ncRNAs as proximal or distal to neighboring genes, 57% of  
390 likely functional and 35% of likely nonfunctional ITRs and ncRNAs were proximal to  
391 neighboring genes, respectively (FET,  $p < 2E-09$ ). To assess if a subset these likely functional,  
392 proximal ITRs/ncRNAs may be unannotated exons of known genes, we assessed whether they  
393 tended to have similar features with their neighbors. Compared to feature similarities between  
394 neighboring and random gene pairs (Supplemental Fig. 4B-D), likely functional ITRs/ncRNAs  
395 were less similar to their neighbors, regardless of proximity (Supplemental Fig. 4C,D). Thus,  
396 despite their proximity to annotated genes, it remains unclear if some ITRs or annotated ncRNAs  
397 represent unannotated exon extensions of known genes or not. In addition, for proximal  
398 functional ITRs/annotated ncRNAs, we cannot rule out the possibility that they represent false-  
399 positive functional predictions due to the accessible and active chromatin states of nearby genes.  
400 Given the challenge in ascertaining the origin of likely functional, proximal ITRs/ncRNAs, we  
401 instead conservatively estimate that 116 distal, functional ITRs and annotated ncRNAs may  
402 represent fragments of novel genes.

### 403 **Intergenic transcribed regions and annotated ncRNAs do not resemble benchmark RNA** 404 **genes**

405 Thus far, we predicted the majority of ITR and annotated ncRNA sequences as nonfunctional.  
406 We demonstrated that the full model was able to predict conditional phenotype genes  
407 (Supplemental Fig. 1A) and the tissue-agnostic model was more effective than the full model in  
408 predicting narrowly expressed phenotype genes (Supplemental Fig. 1B,C). Thus, conditional or

409 tissue-specific functionality do not fully explain why the majority of ITRs and ncRNAs are  
410 predicted as nonfunctional. However, the function prediction models so far were built by  
411 contrasting protein-coding genes with pseudogenes and it remains possible that these protein-  
412 coding gene-based models can not accurately predict RNA genes. To evaluate this possibility,  
413 we generated a tissue-agnostic model using features calculated from a randomly-selected 100 bp  
414 sequence within a phenotype protein-coding gene or pseudogene body (for features, see  
415 Supplemental Table 6). The reason for using 100 bp sequence is that most RNA genes are too  
416 short to be considered by earlier models, which were based on 500 bp sequences. In addition,  
417 features from the tissue agnostic model are more suitable for RNA gene prediction as annotated  
418 RNA genes tend to be more narrowly expressed than phenotype genes (U tests, all  $p < 2e-05$ ;  
419 Supplemental Fig. 3B). The 100 bp tissue-agnostic model performed similarly to the full 500 bp  
420 model in distinguishing between phenotype protein-coding genes and pseudogenes, except with  
421 higher FNR (AUC-ROC=0.97; FNR=13%; FPR=5%; Supplemental Fig. 5), but only predicted  
422 three out of six RNA genes with documented mutant phenotypes (phenotype RNA genes) as  
423 functional (Supplemental Fig. 5I). Further, other RNA Pol II-transcribed RNA genes exhibited  
424 mixed predictions from the 100 bp tissue-agnostic model, as 15% of microRNA (miRNA)  
425 primary transcripts (Supplemental Fig. 5J), 73% of small nucleolar RNAs (snRNAs;  
426 Supplemental Fig. 5K), and 50% of small nuclear RNAs (snRNAs; Supplemental Fig. 5L) were  
427 predicted as functional. Although the proportion of phenotype RNA genes predicted as  
428 functional (50%) is significantly higher than the proportion of pseudogenes predicted as  
429 functional (5%, FET,  $p < 0.004$ ), this finding suggests that a model built with protein-coding  
430 genes has a substantial FNR for detecting RNA genes.

431 To determine whether the suboptimal predictions by the phenotype protein-coding gene-  
432 based models are because RNA genes belong to a class of their own, we next built a multi-class  
433 function prediction model aimed at distinguishing four classes of sequences: benchmark RNA  
434 genes ( $n=46$ ), phenotype protein-coding genes (1,882), pseudogenes (3,916), and randomly-  
435 selected, unexpressed intergenic regions (4,000). Benchmark RNA genes include six phenotype  
436 RNA genes and 40 high-confidence miRNA primary transcript sequences (see Methods).  
437 Unexpressed intergenic sequences were included to provide another set of likely nonfunctional  
438 sequences distinct from pseudogenes. Expression breadth and tissue-specific features were  
439 excluded from the four-class model and 100 bp sequences were used. In the four-class model,

440 87% of benchmark RNA genes, including all six phenotype RNA genes, were predicted as  
441 functional sequences (65% RNA gene-like and 22% phenotype protein-coding gene-like; **Fig.**  
442 **6A**). In addition, 95% of phenotype genes were predicted as functional (**Fig. 6B**), including 80%  
443 of narrowly expressed genes, an increase of 22% over the 500 bp tissue-agnostic model  
444 (Supplemental Fig. 1B). For the remaining two sequence classes, 70% of pseudogenes (**Fig. 6C**)  
445 and 100% of unexpressed intergenic regions (**Fig. 6D**) were predicted as nonfunctional (either  
446 pseudogenes or unexpressed intergenic sequences). Thus, the four-class model improves  
447 prediction accuracy of RNA genes and narrowly expressed genes. However, the inclusion of  
448 RNA genes in the model has significantly increased the ambiguity in pseudogene classification.

449         Since the four-class model was able to distinguish benchmark RNA genes from  
450 nonfunctional sequence classes, we next evaluated whether ITRs and annotated ncRNAs  
451 resemble functional sequences with the four-class model. Note that the 100 bp model used here  
452 allowed us to evaluate an additional 10,938 ITRs and 1,406 annotated ncRNAs. We find that  
453 34% of ITR, 38% of Araport ncRNA, and of 65% TAIR ncRNAs were predicted as functional  
454 sequences (**Fig. 6E-G**). To provide an overall estimate of the proportion of likely-functional  
455 ITRs and annotated ncRNAs, we considered the predictions from the four-class model (**Fig. 6**),  
456 the full model (**Fig. 3,4**), and the tissue-agnostic models (Supplemental Fig. 2,5). Based on  
457 support from at least one of the four models, we classified 4,437 ITRs (38%) and 796 annotated  
458 ncRNAs (44%) as functional, as they resembled either phenotype protein-coding or RNA genes.  
459 Our findings lend support that they are likely parts of novel or annotated genes. Meanwhile, we  
460 find that a substantial number of ITRs (62%) and annotated ncRNAs (56%) are predicted as  
461 nonfunctional. Moreover, at least a third of ITRs (**Fig. 6E**) and Araport ncRNAs (**Fig. 6F**) most  
462 closely resemble unexpressed intergenic regions. Thus, we show that the majority of ITRs and  
463 annotated ncRNA regions resemble nonfunctional genomic regions, and therefore could  
464 represent regions of noisy transcription.

## 465 **CONCLUSION**

466 Discerning the location of functional regions within a genome represents a key goal in genomic  
467 biology. Despite advances in computational gene finding, it remains challenging to determine  
468 whether intergenic transcribed regions (ITRs) represent functional or noisy biochemical activity.  
469 We established robust function prediction models based on the evolutionary, biochemical, and



470 structural characteristics of phenotype genes and pseudogenes. The prediction models accurately  
471 define functional and nonfunctional regions and are applicable genome-wide. These results echo  
472 recent findings that human phenotype genes could be distinguished from pseudogenes (Tsai et al.  
473 2017). Given that function predictions were successful in both plant and metazoan model  
474 systems, integrating the evolutionary and biochemical features of known genes will likely be  
475 applicable to any species. The next step will be to test whether function prediction models can be  
476 applied across species, which could ultimately allow the phenotype data and omics resources  
477 available in model systems to effectively guide the identification of functional regions in non-  
478 models.

479 Expression data was highly informative to functional predictions. We found that the  
480 prediction model based on only 24 transcription activity-related features performs nearly as well  
481 as the full model that integrates additional information including conservation, H3 mark,  
482 methylation, and TF binding data. In human, use of transcription data from cell lines also  
483 produced highly accurate predictions of functional genomic regions (AUC-ROC=0.96; Tsai et al.  
484 2017). Despite the importance of transcription data, we emphasize that the presence of  
485 expression evidence is an extremely poor predictor. Taken together, these results indicate that  
486 function prediction models can be established in any species, model or not, with a modest  
487 number of transcriptome datasets (e.g. 51 in this study and 19 in human). One caveat of the  
488 current model is that narrowly-expressed phenotype genes are frequently predicted as  
489 pseudogene and broadly-expressed pseudogenes tend to be called functional. To improve the  
490 function prediction model, it will be important to explore additional features unrelated to  
491 transcription. Because few phenotype genes are narrowly-expressed (5%) in the *A. thaliana*  
492 training data, more phenotyping data for narrowly expressed genes will be crucial as well.

493 Upon application of the function prediction models genome-wide, we found that 4,427  
494 ITRs and 796 annotated ncRNAs in *A. thaliana* are likely functional. Assuming each entry  
495 equals a novel gene, this estimate represents a 19% increase in annotated gene space (excluding  
496 annotated ncRNAs) for the model plant. However, considering the high false positive rates (e.g.  
497 10% for the full and 31% for the four-class model), this is most likely an overestimate of the  
498 number of novel genes contributed by functional ITRs and annotated ncRNAs. In addition, we  
499 emphasize that the majority of ITRs and ncRNAs resemble pseudogenes and random  
500 unexpressed intergenic regions. Similarly, most human ncRNAs are more similar to

501 nonfunctional sequences than they are to protein coding and RNA genes (Tsai et al. 2017).  
502 Furthermore, the significant relationship between the amount of intergenic expression occurring  
503 in a species and the size of a genome is consistent with the interpretation that intergenic  
504 transcripts are generally nonfunctional. Thus, instead of assuming any expressed sequence must  
505 be functionally significant, we advocate that the null hypothesis should be that it is not,  
506 particularly considering that most ITRs and annotated ncRNAs have not been experimentally  
507 characterized. The machine learning framework we have described provides an approach for  
508 distinguishing between functional and noisy biochemical activity, and will help defining the gene  
509 space in a genome.

## 510 **METHODS**

### 511 **Identification of transcribed regions in leaf tissue of 15 flowering plants**

512 RNA-sequencing (RNA-seq) datasets were retrieved from the Sequence Read Archive (SRA) at  
513 the National Center for Biotechnology Information (NCBI; [www.ncbi.nlm.nih.gov/sra/](http://www.ncbi.nlm.nih.gov/sra/)) for 15  
514 flowering plant species (Supplemental Table 1). All datasets were generated from leaf tissue and  
515 sequenced on Illumina HiSeq 2000 or 2500 platforms. Genome sequences and gene annotation  
516 files were downloaded from Phytozome v.11 ([www.phytozome.net](http://www.phytozome.net); Goodstein et al. 2011) or  
517 Oropetium Base v.01 ([www.sviridis.org](http://www.sviridis.org); VanBuren et al. 2015). Genome sequences were repeat  
518 masked using RepeatMasker v4.0.5 ([www.repeatmasker.org](http://www.repeatmasker.org)) if a repeat-masked version was not  
519 available. Only one end from paired-end read datasets were utilized in downstream processing.  
520 Reads were trimmed to be rid of low scoring ends and residual adaptor sequences using  
521 Trimmomatic v0.33 (LEADING:3 TRAILING:3 SLIDINGWINDOW:4:20 MINLEN:20, Bolger  
522 et al. 2014) and mapped to genome sequences using TopHat v2.0.13 (default parameters except  
523 as noted below; Kim et al. 2013). Reads  $\geq 20$  nucleotides in length that mapped uniquely within a  
524 genome were used in further analysis.

525 For each species, thirty million mapped reads were randomly selected from among all  
526 datasets and assembled into transcript fragments using Cufflinks v2.2.1 (default parameters  
527 except as noted below, Trapnell et al. 2010), while correcting for sequence-specific biases during  
528 the sequencing process by providing an associated genome sequence with the -b flag. The  
529 expected mean fragment length for assembled transcript fragments in Cufflinks was set to 150  
530 from the default of 200 so that expression levels in short fragments would not be overestimated.

531 The 1<sup>st</sup> and 99<sup>th</sup> percentile of intron lengths for each species were used as the minimum and  
532 maximum intron lengths, respectively, for both the TopHat2 and Cufflinks steps. Intergenic  
533 transcribed regions (ITRs) were defined by transcript fragments that did not overlap with gene  
534 annotation and did not have significant six-frame translated similarity to plant protein sequences  
535 in Phytozome v.10 (BLASTX E-value < 1E-05). The correlation between assembled genome  
536 size and gene counts was determined with data from the first 50 published plant genomes  
537 (Michael and Jackson, 2013).

### 538 **Phenotype data sources**

539 Mutant phenotype data for *A. thaliana* protein-coding genes was collected from a published  
540 dataset (Lloyd and Meinke 2012), the Chloroplast 2010 database (Ajjawi et al. 2010; Savage et  
541 al. 2013), and the RIKEN phenome database (Kuromori et al. 2006) as described by Lloyd et al.  
542 (2015). Phenotype genes used in our analyses were those whose disruption resulted in lethal or  
543 visible defects under standard laboratory growth conditions. Genes with documented mutant  
544 phenotypes under standard conditions were considered as a distinct and non-overlapping  
545 category from other annotated protein-coding genes. We identified six RNA genes with  
546 documented loss-of-function phenotypes through literature searches (Supplemental Table 7): *At4*  
547 (AT5G03545; Shin et al. 2006), *MIR164A* and *MIR164D* (AT2G47585 and AT5G01747,  
548 respectively; Guo et al. 2005), *MIR168A* (AT4G19395; Li et al. 2012b), and *MIR828A* and *TAS4*  
549 (AT4G27765 and AT3G25795, respectively; Hsieh et al. 2009). Conditional phenotype genes  
550 were those belonging to the Conditional phenotype group as described by Lloyd and Meinke  
551 (2012). Loss-of-function mutants of these genes exhibited phenotype only under stress  
552 conditions.

### 553 ***Arabidopsis thaliana* genome annotation**

554 *A. thaliana* protein-coding gene, miRNA gene, snoRNA gene, snRNA gene, ncRNA region,  
555 pseudogene, and transposable element annotations were retrieved from The Arabidopsis  
556 Information Resource v.10 (TAIR10; [www.arabidopsis.org](http://www.arabidopsis.org); Berardini et al. 2015). Additional  
557 miRNA gene and lncRNA region annotations were retrieved from Araport v.11  
558 ([www.araport.org](http://www.araport.org); Krishnakumar et al. 2015). A pseudogene-finding pipeline (Zou et al. 2009)  
559 was used to identify additional pseudogene fragments and count the number of disabling

560 mutations (premature stop or frameshift mutations). Genes, pseudogenes, and transposons with  
561 overlapping annotation were excluded from further analysis. Overlapping lncRNA annotations  
562 were merged for further analysis. When pseudogenes from TAIR10 and the pseudogene-finding  
563 pipeline overlapped, the longer pseudogene annotation was used.

564 *A. thaliana* ITRs analyzed include: (1) the Set 2 ITRs in Moghe et al. (2013), (2) the  
565 novel transcribed regions from Araport v.11, and (3) additional ITRs from 206 RNA-seq datasets  
566 (Supplemental Table 5). Reads were trimmed, mapped, and assembled into transcript fragments  
567 as described above, except that overlapping transcript fragments from across datasets were  
568 merged. ITRs analyzed did not overlap with any TAIR10, Araport11, or pseudogene annotation.  
569 Overlapping ITRs from different annotated subsets were kept based on a priority system:  
570 Araport11 > Set 2 ITRs from Moghe et al. (2013) > ITRs identified in this study. For each  
571 sequence entry (gene, ncRNA, pseudogene, transposable element, or ITR), a 100 and 500 base  
572 pair (bp) window was randomly chosen for calculating feature values and subsequent model  
573 building steps. Feature descriptions are provided in the following sections. The feature values for  
574 randomly selected 500 and 100 bp windows are provided in Supplemental Table 2 and 6,  
575 respectively. Additionally, non-expressed intergenic sequences were randomly-sampled from  
576 genome regions that did not overlap with annotated genes, pseudogenes, transposable elements,  
577 or regions with genic or intergenic transcript fragments (100 bp, n=4,000; 500 bp, n=3,716). All  
578 100 and 500 bp windows described above are referred to as sequence windows throughout the  
579 Methods section.

## 580 **Sequence conservation and structure features**

581 There were 10 sequence conservation features examined. The first two were derived from  
582 comparisons between *A. thaliana* accessions including nucleotide diversity and Tajima's D  
583 among 81 accessions (Cao et al. 2011) using a genome matrix file from the 1,001 genomes  
584 database ([www.1001genomes.org](http://www.1001genomes.org)). The python scripts are available through GitHub  
585 (<https://github.com/ShiuLab/GenomeMatrixProcessing>). The remaining eight features were  
586 derived from cross-species comparisons, three based on multiple sequence and five based on  
587 pairwise alignments. Three multiple sequence alignment-based features were established using  
588 aligned genomic regions between *A. thaliana* and six other plant species (*Glycine max*,  
589 *Medicago truncatula*, *Populus trichocarpa*, *Vitis vinifera*, *Sorghum bicolor*, and *Oryza sativa*)

590 (referred to as conserved blocks). For each conserved block, the first feature was the proportion  
591 of a sequence window that overlapped a conserved block (referred to as coverage), and the two  
592 other features were the maximum and average phastCons scores within each sequence window.  
593 The phastCons score was determined for each nucleotide within conserved blocks (Li et al.  
594 2012a). Nucleotides in a sequence window that did not overlap with a conserved block were  
595 assigned a phastCons score of 0. For each sequence window, five pairwise alignment-based  
596 cross-species conservation features were the percent identities to the most significant BLASTN  
597 match (if  $E\text{-value} < 1E\text{-}05$ ) in each of five taxonomic groups. The five taxonomic groups included  
598 the *Brassicaceae* family ( $n_{\text{species}}=7$ ), other dicotyledonous plants (22), monocotyledonous plants  
599 (7), other embryophytes (3), and green algae (5). If no sequence with significant similarity was  
600 present, percent identity was scored as zero.

601 For sequence-structure features, we used 125 conformational and thermodynamic  
602 dinucleotide properties collected from DiProDB database (Friedel et al. 2009). Because the  
603 number of dinucleotide properties was high and dependent, we reduced the dimensionality by  
604 utilizing principal component (PC) analysis as described previously (Tsai et al. 2015). Sequence-  
605 structure values corresponding to the first five PCs were calculated for all dinucleotides in and  
606 averaged across the length of a sequence window and used as features when building function  
607 prediction models.

### 608 **Transcription activity features**

609 We generated four multi-dataset and 20 individual dataset transcription activity features. To  
610 identify a set of RNA-seq datasets to calculate multi-dataset features, we focused on the 72 of  
611 206 RNA-seq datasets each with  $\geq 20$  million reads (see above; Supplemental Table 5).  
612 Transcribed regions were identified with TopHat2 and Cufflinks as described in the RNA-seq  
613 analysis section except that the 72 *A. thaliana* RNA-seq datasets were used. Following transcript  
614 assembly, we excluded 21 RNA-seq datasets because they had unusually high RPKM (Reads Per  
615 Kilobase of transcript per Million mapped reads) values (median RPKM value  
616 range= $272\sim 2,504,294$ ) compared to the rest ( $2\sim 252$ ). The remaining 51 RNA-seq datasets were  
617 used to generate four multi-dataset transcription activity features including: expression breadth,  
618 95<sup>th</sup> percentile expression level, maximum transcript coverage, and presence of expression  
619 evidence (for values see Supplemental Table 5). Expression breadth was the number of RNA-seq

620 datasets that have  $\geq 1$  transcribed region that overlapped with a sequence window. The 95<sup>th</sup>  
621 percentile expression level was the 95<sup>th</sup> percentile of RPKM values across 51 RNA-seq datasets  
622 where RPKM values were set to 0 if there was no transcribed region for a sequence window.  
623 Maximum transcript coverage was the maximum proportion of a sequence window that  
624 overlapped with a transcribed region across 51 RNA-seq datasets. Presence of expression  
625 evidence was determined by overlap between a sequence window and any transcribed region in  
626 the 51 RNA-seq datasets.

627 In addition to features based on multiple datasets, 20 individual dataset features were  
628 derived from 10 datasets: seven tissue/organ-specific RNA-seq datasets including pollen  
629 (SRR847501), seedling (SRR1020621), leaf (SRR953400), root (SRR578947), inflorescence  
630 (SRR953399), flower, (SRR505745) and silique (SRR953401), and three datasets from non-  
631 standard growth conditions, including dark-grown seedlings (SRR974751) and leaf tissue under  
632 drought (SRR921316) and fungal infection (SRR391052). For each of these 10 RNA-seq  
633 datasets, we defined two features for each sequence window: the maximum transcript coverage  
634 (as described above) and the maximum RPKM value of overlapping transcribed regions (referred  
635 to as Level in **Fig. 2**). If no transcribed regions overlapped a sequence window, the maximum  
636 RPKM value was set as 0. For the analysis of narrowly- and broadly-expressed phenotype genes  
637 and pseudogenes (Supplemental Fig. 1B,C), we used 28 out of 51 RNA-seq datasets generated  
638 from a single tissue and in standard growth conditions to calculate the number of tissues with  
639 evidence of expression (tissue expression breadth). In total, seven tissues were represented  
640 among the 28 selected RNA-seq datasets (see above; Supplemental Table 5), and thus tissue  
641 expression breadth ranges from 0 to 7 (note that only 1 through 7 are shown in Supplemental Fig.  
642 1B,C due to low sample size of phenotype genes in the 0 bin). The tissue breadth value is distinct  
643 from the expression breadth feature used in model building that was generated using all 51  
644 datasets and considered multiple RNA-seq datasets from the same tissue separately (range: 0-  
645 51).

### 646 **Histone 3 mark features**

647 Twenty histone 3 (H3) mark features were calculated based on eight H3 chromatin  
648 immunoprecipitation sequencing (ChIP-seq) datasets from SRA. The H3 marks examined  
649 include four associated with activation (H3K4me1: SRR2001269, H3K4me3: SRR1964977,

650 H3K9ac: SRR1964985, and H3K23ac: SRR1005405) and four associated with repression  
651 (H3K9me1: SRR1005422, H3K9me2: SRR493052, H3K27me3: SRR3087685, and H3T3ph:  
652 SRR2001289). Reads were trimmed as described in the RNA-seq section and mapped to the  
653 TAIR10 genome with Bowtie v2.2.5 (default parameters; Langmead et al. 2009). Spatial  
654 Clustering for Identification of ChIP-Enriched Regions (SICER) v.1.1 (Xu et al. 2014) was used  
655 to identify ChIP-seq peaks with a false discover rate  $\leq 0.05$  with a non-overlapping window size  
656 of 200, a gap parameter of 600, and an effective genome size of 0.92 according to Koehler et al.  
657 (2011). For each H3 mark, two features were calculated for each sequence window: the  
658 maximum intensity among overlapping peaks and peak coverage (proportion of overlap with the  
659 peak that overlaps maximally with the sequence window). In addition, four multi-mark features  
660 were generated. Two of the multi-mark features were the number of activating marks (0-4)  
661 overlapping a sequence window and the proportion of a sequence window overlapping any peak  
662 from any of the four activating marks (activating mark peak coverage). The remaining two multi-  
663 mark features were the same as the two activating multi-mark features except focused on the four  
664 repressive marks.

### 665 **DNA methylation features**

666 Twenty-one DNA methylation features were calculated from bisulfite-sequencing (BS-seq)  
667 datasets from seven tissues (pollen: SRR516176, embryo: SRR1039895, endosperm:  
668 SRR1039896, seedling: SRR520367, leaf: SRR1264996, root: SRR1188584, and inflorescence:  
669 SRR2155684). BS-seq reads were trimmed as described above and processed with Bismark v.3  
670 (default parameters; Krueger and Andrews 2011) to identify methylated and unmethylated  
671 cytosines in CG, CHH, and CHG (H = A, C, or T). Methylated cytosines were defined as those  
672 with  $\geq 5$  mapped reads and with  $>50\%$  of mapped reads indicating that the position was  
673 methylated. For each BS-seq dataset, the percentage of methylated cytosines in each sequence  
674 window for CG, CHG, and CHH contexts were calculated if the sequence window had  $\geq 5$   
675 cytosines with  $\geq 5$  reads mapping to the position. To determine whether the above parameters  
676 were reasonable, we assessed the false positive rate of DNA methylation calls by evaluating the  
677 proportion of cytosines in the chloroplast genome that are called as methylated, as the  
678 chloroplast genome has few DNA methylation events (Ngernprasirtsiri et al. 1988; Zhang et al.  
679 2006). Based on the above parameters, 0-1.5% of cytosines in CG, CHG, or CHH contexts in the

680 chloroplast genome were considered methylated in any of the seven BS-seq datasets. This  
681 indicated that the false positive rates for DNA methylation calls were low and the parameters  
682 were reasonable.

### 683 **Chromatin accessibility and transcription factor binding features**

684 Chromatin accessibility features consisted of ten DHS-related features and one micrococcal  
685 nuclease sequencing (MNase-seq)-derived feature. DHS peaks from five tissues (seed coat,  
686 seedling, root, unopened flowers, and opened flowers) were retrieved from the Gene Expression  
687 Omnibus (GSE53322 and GSE53324; Sullivan et al. 2014). For each of the five tissues, the  
688 maximum DHS peak intensity and DHS peak coverage were calculated for each sequence  
689 window. Normalized nucleosome occupancy per bp based on MNase-seq was obtained from Liu  
690 et al. (2015). The average nucleosome occupancy value was calculated across each sequence  
691 window. Transcription factor (TF) binding site features were based on *in vitro* DNA affinity  
692 purification sequencing data of 529 TFs (O'Malley et al. 2016). Two features were generated for  
693 each sequence window: the total number of TF binding sites and the number of distinct TFs  
694 bound.

### 695 **Single-feature prediction performance**

696 The ability for each single feature to distinguish between functional and nonfunctional regions  
697 was evaluated by calculating AUC-ROC value with the Python scikit-learn package (Pedregosa  
698 et al. 2011). AUC-ROC values range between 0.5 (equivalent to random guessing) and 1 (perfect  
699 predictions) and values above 0.7, 0.8, and 0.9 are considered to be fair, good, and excellent,  
700 respectively. Thresholds to predict sequences as functional or nonfunctional using a single  
701 feature were defined by the feature value that produced the highest F-measure, the harmonic  
702 mean of precision (proportion of sequences predicted as functional that are truly functional) and  
703 recall (proportion of truly functional sequences predicted as functional). The F-measure allows  
704 consideration of both false positives and false negatives at a given threshold. FPR were  
705 calculated as the percentage of negative (nonfunctional) cases with values above or equal to the  
706 threshold and thus falsely predicted as functional. FNR were calculated as the percentage of  
707 positive (functional) cases with values below the threshold and thus falsely predicted as  
708 nonfunctional.



## 709 **Binary classification with machine learning**

710 For binary classification (two-class) models that contrasted phenotype genes and pseudogenes,  
711 the random forest (RF) implementation in the Waikato Environment for Knowledge Analysis  
712 software (WEKA; Hall et al. 2009) was utilized. Three types of two-class models were  
713 established, including the full model (500 bp sequence window, **Fig. 3C,D** and **Fig. 4**), tissue-  
714 agnostic models (500 bp, Supplemental Fig. 2; 100 bp, Supplemental Fig. 5), and single feature  
715 category models (**Fig. 3C,D**). For each model type, we first generated 100 balanced datasets by  
716 randomly selecting equal numbers of phenotype genes (positive examples) and pseudogenes  
717 (negative examples). For each of these 100 datasets, 10-fold stratified cross-validation was  
718 utilized, where the model was trained using 90% of sequences and tested on the remaining 10%.  
719 Thus, for each model type, a sequence window had 100 prediction scores, where each score was  
720 the proportion of 500 random forest trees that predicted a sequence as a phenotype gene in a  
721 balanced dataset. The median of 100 prediction scores was used as the functional likelihood (FL)  
722 value (Supplemental Table 4). The FL threshold to predict a sequence as functional or  
723 nonfunctional was defined based on maximum F-measure as described in the previous section.  
724 We tested multiple -K parameters (2 to 25) in the WEKA-RF implementation, which alters the  
725 number of randomly-selected features included in each RF tree (Supplemental Table 8), and  
726 found that 15 randomly-selected features provided the highest performance based on AUC-ROC  
727 (calculated and visualized using the ROCR package; Sing et al. 2005). Binary classification  
728 models were also built using all features from 500 bp sequences (equivalent to the full model)  
729 with the Sequential Minimal Optimization - Support Vector Machine (SMO-SVM)  
730 implementation in WEKA (Hall et al. 2009). The results of SMO-SVM models were highly  
731 similar to the full RF results: *PCC* between the FL values generated by RF and SMO-  
732 SVM=0.97; AUC-ROC of SMO-SVM=0.97; FPR=12%; FNR=3%. By comparison, the full RF  
733 model had AUC-ROC=0.98, FPR=10%, FNR=4%.

734 Tissue-agnostic models were generated by excluding the expression breadth feature and  
735 95<sup>th</sup> percentile expression level and replacing all features from RNA-seq, BS-seq, and DHS  
736 datasets that were available in multiple tissues. For multiple-tissue RNA-seq data, the maximum  
737 expression level across 51 RNA-seq datasets (in RPKM) and maximum coverage (as described  
738 in the transcription activity section) of a sequence window in any of 51 RNA-seq datasets were  
739 used. For multi-tissue DNA methylation features, minimum proportions of methylated cytosines

740 in any tissue in CG, CHG, and CHH contexts were used. For DHS data, the maximum peak  
741 intensity and peak coverage was used instead. In single feature category predictions, fewer total  
742 features were used and therefore lower  $-K$  values (i.e. the number of random features selected  
743 when building random forests) were considered in parameter searches (Supplemental Table 8).

#### 744 **Multi-class machine learning model**

745 For the four-class model, benchmark RNA gene, phenotype protein-coding gene, pseudogene,  
746 and random unexpressed intergenic sequences were used as the four training classes. Benchmark  
747 RNA genes consisted of six RNA genes with documented loss-of-function phenotypes and 40  
748 high-confidence miRNA genes from miRBase ([www.mirbase.org](http://www.mirbase.org); Kozomara and Griffiths-Jones  
749 2014). We generated 250 datasets with equal proportions (larger classes randomly sampled) of  
750 training sequences. Two-fold stratified cross-validation was utilized due to the low number of  
751 benchmark RNA genes. The features included those described for the tissue-agnostic model and  
752 focused on 100 bp sequence windows. The RF implementation, *cforest*, in the *party* package of  
753 R (Strobl et al. 2008) was used to build the classifiers. The four-class predictions provide  
754 prediction scores for each sequence type: an RNA gene, phenotype protein-coding gene,  
755 pseudogene, and unexpressed intergenic score (Supplemental Table 4). The prediction scores  
756 indicate the proportion of random forest trees that classify a sequence as a particular class.  
757 Median prediction scores from across 100 balanced runs were used as final prediction scores.  
758 Scores from a single balanced dataset models sum to 1, but not the median from 100 balanced  
759 runs. Thus, the median scores were scaled to sum to 1. For each sequence window, the maximum  
760 prediction score among the four classes was used to classify a sequence as phenotype gene,  
761 pseudogene, unexpressed intergenic, or RNA gene.

#### 762 **FIGURE LEGENDS**

763 **Figure 1.** Relationship between genome size and number of nucleotides covered by RNA-seq  
764 reads (expression) in 15 flowering plant species. (A) annotated genic regions. (B) intergenic  
765 regions excluding any annotated features. Mb: megabase. Gb: gigabase. Dotted lines: linear  
766 model fits.  $r^2$ : square of Pearson's correlation coefficient.

767 **Figure 2.** Predictions of functional (phenotype gene) and non-functional (pseudogene) sequences  
768 based on each individual feature. Prediction performance is measured using Area Under the

769 Curve - Receiver Operating Characteristic (AUC-ROC). Features include those in the categories  
770 of (A) transcription activity, (B) sequence conservation, (C) DNA methylation, (D) transcription  
771 factor (TF) binding, (E) histone 3 (H3) marks, (F) sequence structure, and (G) chromatin  
772 accessibility. AUC-ROC ranges in value from 0.5 (equivalent to random guessing) to 1 (perfect  
773 predictions). Dotted lines: median AUC-ROC of features in a category.

774 **Figure 3.** Predictions of functional and nonfunctional sequences based on multiple features.  
775 Smoothed scatterplots of the first two principle components (PCs) of (A) phenotype gene and (B)  
776 pseudogene features. The percentages on the axes in (A) indicate the feature value variation  
777 explained by the associated PC. (C) AUC-ROC values of function prediction models built when  
778 considering all features (Full), all except transcription activity (TX)-related features (Full (-TX)),  
779 and all features from each category. The category abbreviations follow those in **Fig. 2.** (C)  
780 Precision-recall curves of the models with matching colors from (B). The models were built  
781 using feature values calculated from 500 bp sequence windows.

782 **Figure 4.** Functional likelihood distributions of various sequence classes based on the full  
783 model. (A) Phenotype genes. (B) Pseudogenes. (C) Annotated protein-coding genes. (D)  
784 Transposable elements. (E) Random unexpressed intergenic sequences. (F) Intergenic  
785 transcribed regions (ITR). (G) Araport11 ncRNAs. (H) TAIR10 ncRNAs. The full model was  
786 established using 500 bp sequence windows. Higher and lower functional likelihood values  
787 indicate greater similarity to phenotype genes and pseudogenes, respectively. Vertical dashed  
788 lines indicate the threshold for calling a sequence as functional or nonfunctional. The  
789 percentages to the left and right of the dashed line indicate the percent of sequences predicted as  
790 functional or nonfunctional, respectively.

791 **Figure 5.** Proportion of phenotype genes, pseudogenes, ITRs, and ncRNAs predicted as  
792 functional in the full and single-category models. Percentages of sequence classes that are  
793 predicted as functional in models based on all features and the single category models, each  
794 using all features from a category (abbreviated according to **Figure 2.** The models are sorted  
795 from left to right based on performance (AUC-ROC). The colors of and numbers within the  
796 blocks indicate the proportion sequences predicted as functional by a given model. Phenotype  
797 gene and pseudogene sequences are shown in three sub-groups: all sequences (All), and those

798 predicted as functional (high functional likelihood (FL)) and nonfunctional (low FL) in the full  
799 model. ITR: intergenic transcribed regions.

800 **Figure 6.** Function predictions based on a four-class prediction model. (A) Stacked bar plots  
801 indicate the prediction scores of benchmark RNA genes for each of the four classes: dark blue -  
802 phenotype protein-coding gene (Ph), cyan - RNA gene (RNA), red - pseudogene (Ps), yellow -  
803 random intergenic sequence (Ig). A benchmark RNA gene is classified as one of the four classes  
804 according to the highest prediction score. The color bars below the chart indicate the predicted  
805 class, with the same color scheme as the prediction score. Sequences classified as Ph or RNA  
806 were considered functional, while those classified as Ps or Ig were considered nonfunctional.  
807 Percentages below a classification region indicate the proportion of sequences classified as that  
808 class. (B) Phenotype protein-coding gene prediction scores. (C) Pseudogene prediction scores.  
809 (D) Random unexpressed intergenic region prediction scores. Note that no sequence was  
810 predicted as functional. (E) Intergenic transcribed region (ITR), (F) Araport11 ncRNA regions.  
811 (G) TAIR10 ncRNA regions.

812

## 813 SUPPLEMENTAL FIGURE LEGENDS

814 **Supplemental Figure 1.** Impacts of conditional phenotypes and expression breadth on the  
815 function prediction model. (A) Functional likelihood distributions of phenotype genes with  
816 mutant phenotypes under standard growth conditions (non-conditional) and non-standard growth  
817 conditions such as stressful environments (conditional) based on the 500 bp full model. Feature  
818 values were calculated from a random 500 bp region from within the sequence body. Higher and  
819 lower functional likelihood values indicate a greater similarity to phenotype genes and  
820 pseudogenes, respectively. (B,C) Distributions of functional likelihood scores for phenotype  
821 genes (blue) and pseudogenes (red) for sequences with various breadths of expression for (B) the  
822 500 bp full model and (C) the 500 bp tissue-agnostic model generated by excluding the  
823 expression breadth and features available from multiple tissues. The tissue-agnostic model is  
824 aimed toward minimizing the effects of biochemical activity occurring across multiple tissues  
825 and predicts a greater proportion of narrowly-expressed phenotype genes as functional compared  
826 to the full model.

827 **Supplemental Figure 2.** Distributions of functional likelihood scores based on the 500 bp tissue-  
828 agnostic model. (A) Phenotype genes. (B) Pseudogenes. (C) Annotated protein-coding genes. (D)  
829 Transposable elements. (E) Random unexpressed intergenic sequences. (F) Intergenic  
830 transcribed regions (ITR). (G) Araport11 ncRNAs. (H) TAIR10 ncRNAs. Vertical dashed lines  
831 display the threshold to define a sequence as functional or nonfunctional. The numbers to the left  
832 and right of the dashed line show the percentage of sequences predicted as functional or  
833 nonfunctional, respectively.

834 **Supplemental Figure 3.** Distributions of expression breadth of different sequence classes. (A)  
835 Based on 500 bp feature regions. (B) Based on 100 bp feature regions.

836 **Supplemental Figure 4.** Distance of ITRs and annotated ncRNA regions to and feature  
837 similarity with neighboring genes. (A) Distance from intergenic transcribed regions (ITRs) and  
838 annotated ncRNAs to the closest neighboring gene. ITR and ncRNA sequences are separated by  
839 whether they are predicted as functional (F) or nonfunctional (NF) by the 500 bp full model. (B)  
840 Feature similarity based on Pearson's Correlation Coefficients (PCC) between random pairs of  
841 ITRs, Araport11 ncRNAs, TAIR10 ncRNAs, or annotated genes. (C) Feature similarity between  
842 proximal neighbors (within 95th percentile (456 bp) of intron lengths), and (D) Feature similarity  
843 between distal neighbors (>456 bp). Pairs involving ITRs and annotated ncRNAs were divided  
844 by whether the ITR or ncRNA sequence was predicted as functional (F) or nonfunctional (NF)  
845 by the full model. Feature values were quantile normalized prior to calculating correlations.

846 **Supplemental Figure 5.** Distributions of functional likelihood scores based on the 100 bp tissue-  
847 agnostic model. (A) Phenotype genes. (B) Pseudogenes. (C) Protein-coding gene. (D)  
848 transposable elements. (E) Random unexpressed intergenic sequences. (F) Intergenic transcribed  
849 regions (ITR). (G) Araport11 ncRNAs. (H) TAIR10 ncRNAs. (I) RNA genes with loss-of-  
850 function mutant phenotypes. (J) MicroRNAs, (K) Small nucleolar RNAs, (L) Small nuclear  
851 RNAs. The tissue-agnostic model was built with 100 bp features and while excluding the  
852 expression breadth and tissue-specific features. Higher functional likelihood values indicate  
853 greater similarity to phenotype genes while lower values indicate similarity to pseudogenes.  
854 Vertical dashed lines display the threshold to define a sequence as functional or nonfunctional.

855 The numbers to the left and right of the dashed line show the percentage of sequences predicted  
856 as functional or nonfunctional, respectively.

## 857 **SUPPLEMENTAL TABLES**

858 **Supplemental Table 1.** Leaf tissue RNA-sequencing datasets for 15 flowering plant species

859

860 **Supplemental Table 2.** Conservation, biochemical, and sequence-structure feature values  
861 calculated from 500 bp sequences.

862

863 **Supplemental Table 3.** False positive and false negative rates for single feature classifications.

864

865 **Supplemental Table 4. Function** predictions for all models generated in this study.

866

867 **Supplemental Table 5.** RNA-sequencing datasets for identifying intergenic transcribed regions,  
868 calculating transcription activity features, and assessing tissue-specific predictions.

869

870 **Supplemental Table 6.** Conservation, biochemical, and sequence-structure feature values  
871 calculated from 100 bp sequences.

872

873 **Supplemental Table 7.** RNA genes with documented loss-of-function phenotypes.

874

875 **Supplemental Table 8.** K parameters tested for random forest runs.

## 876 **DATA ACCESS**

877 All data are available in the text of this article or in the supplemental material.

## 878 **ACKNOWLEDGEMENTS**

879 The authors wish to thank Christina Azodi, Ming-Jung Liu, Gaurav Moghe, Bethany Moore, and  
880 Sahra Uygun and for providing processed data and discussion. This work was supported by  
881 National Science Foundation grants (IOS-1126998, IOS-1546617, and DEB-1655386) to S.-H.S,  
882 and Research Experience for Undergraduates support to R.P.S, as well as the Michigan State  
883 University Dissertation Continuation Fellowship to J.P.L.

884 **AUTHOR CONTRIBUTIONS**

885 J.P.L., Z.T.-Y.T., and S.-H.S. designed the research. J.P.L., Z.T.-Y.T., R.P.S., and N.L.P.  
886 performed the research. J.P.L., Z.T.-Y.T., R.P.S., N.L.P., and S.-H.S. wrote the article.

887 **DISCLOSURE DECLARATION**

888 The authors have no conflicts of interest to disclose.

889 **REFERENCES**

- 890 Ajjawi I, Lu Y, Savage LJ, Bell SM, Last RL. 2010. Large-scale reverse genetics in Arabidopsis:  
891 case studies from the Chloroplast 2010 Project. *Plant Physiol* **152**: 529–540.
- 892 Amundson R, Lauder GV. 1994. Function without purpose. *Biol Philos* **9**: 443–469
- 893 Bennetzen JL. 2005. Mechanisms of Recent Genome Size Variation in Flowering Plants. *Ann*  
894 *Bot* **95**: 127–132.
- 895 Berardini TZ, Reiser L, Li D, Mezheritsky Y, Muller R, Strait E, Huala E. 2015. The  
896 Arabidopsis information resource: Making and mining the “gold standard” annotated  
897 reference plant genome. *Genesis* **53**: 474–485.
- 898 Bernard D, Prasanth KV, Tripathi V, Colasse S, Nakamura T, Xuan Z, Zhang MQ, Sedel F,  
899 Jourden L, Couplier F, et al. 2010. A long nuclear-retained non-coding RNA regulates  
900 synaptogenesis by modulating gene expression. *EMBO J* **29**: 3082–3093.
- 901 Boeck ME, Huynh C, Gevirtzman L, Thompson OA, Wang G, Kasper DM, Reinke V, Hillier  
902 LW, Waterston RH. 2016. The time-resolved transcriptome of *C. elegans*. *Genome Res* **26**:  
903 1441–1450.
- 904 Bolger AM, Lohse M, Usadel B. 2014. Trimmomatic: a flexible trimmer for Illumina sequence  
905 data. *Bioinformatics* **30**: 2114–2120.
- 906 Brenchley R, Spannagl M, Pfeifer M, Barker GLA, D’Amore R, Allen AM, McKenzie N,  
907 Kramer M, Kerhornou A, Bolser D, et al. 2012. Analysis of the bread wheat genome using  
908 whole-genome shotgun sequencing. *Nature* **491**: 705–710.

- 909 Brown JB, Boley N, Eisman R, May GE, Stoiber MH, Duff MO, Booth BW, Wen J, Park S,  
910 Suzuki AM, et al. 2014. Diversity and dynamics of the *Drosophila* transcriptome. *Nature*  
911 **512**: 393–399.
- 912 Cabili MN, Trapnell C, Goff L, Koziol M, Tazon-Vega B, Regev A, Rinn JL. 2011. Integrative  
913 annotation of human large intergenic noncoding RNAs reveals global properties and  
914 specific subclasses. *Genes Dev* **25**: 1915–1927.
- 915 Cao J, Schneeberger K, Ossowski S, Günther T, Bender S, Fitz J, Koenig D, Lanz C, Stegle O,  
916 Lippert C, et al. 2011. Whole-genome sequencing of multiple *Arabidopsis thaliana*  
917 populations. *Nat Genet* **43**: 956–963.
- 918 Chen Z-X, Sturgill D, Qu J, Jiang H, Park S, Boley N, Suzuki AM, Fletcher AR, Plachetzki DC,  
919 FitzGerald PC, et al. 2014. Comparative validation of the *D. melanogaster* modENCODE  
920 transcriptome annotation. *Genome Res* **24**: 1209–1223.
- 921 Cummins R. 1975. Functional Analysis. *J Philos* **72**: 741.
- 922 Doolittle WF, Brunet TDP, Linquist S, Gregory TR. 2014. Distinguishing between “function”  
923 and “effect” in genome biology. *Genome Biol Evol* **6**: 1234–1237.
- 924 Eddy SR. 2013. The ENCODE project: missteps overshadowing a success. *Curr Biol* **23**: R259–  
925 61
- 926 ENCODE Project Consortium. 2012. An integrated encyclopedia of DNA elements in the human  
927 genome. *Nature* **489**: 57–74.
- 928 Friedel M, Nikolajewa S, Sühnel J, Wilhelm T. 2009. DiProDB: a database for dinucleotide  
929 properties. *Nucleic Acids Res* **37**: D37–40.
- 930 Goodstein DM, Shu S, Howson R, Neupane R, Hayes RD, Fazo J, Mitros T, Dirks W, Hellsten  
931 U, Putnam N, et al. 2011. Phytozome: a comparative platform for green plant genomics.  
932 *Nucleic Acids Res* **40**: D1178–D1186.
- 933 Graur D, Zheng Y, Price N, Azevedo RBR, Zufall RA, Elhaik E. 2013. On the immortality of  
934 television sets: “function” in the human genome according to the evolution-free gospel of



- 935 ENCODE. *Genome Biol Evol* **5**: 578–590.
- 936 Gulko B, Gronau I, Hubisz MJ, Siepel A. 2014. *Probabilities of Fitness Consequences for Point*  
937 *Mutations Across the Human Genome*. <http://dx.doi.org/10.1101/006825>.
- 938 Guo H-S, Xie Q, Fei J-F, Chua N-H. 2005. MicroRNA directs mRNA cleavage of the  
939 transcription factor NAC1 to downregulate auxin signals for Arabidopsis lateral root  
940 development. *Plant Cell* **17**: 1376–1386.
- 941 Guttman M, Amit I, Garber M, French C, Lin MF, Feldser D, Huarte M, Zuk O, Carey BW,  
942 Cassady JP, et al. 2009. Chromatin signature reveals over a thousand highly conserved large  
943 non-coding RNAs in mammals. *Nature* **458**: 223–227.
- 944 Hall M, Frank E, Holmes G, Pfahringer B, Reutemann P, Witten IH. 2009. The WEKA data  
945 mining software. *ACM SIGKDD Explorations Newsletter* **11**: 10.
- 946 Hanada K, Zhang X, Borevitz JO, Li W-H, Shiu S-H. 2007. A large number of novel coding  
947 small open reading frames in the intergenic regions of the Arabidopsis thaliana genome are  
948 transcribed and/or under purifying selection. *Genome Res* **17**: 632–640.
- 949 Hanada K, Higuchi-Takeuchi M, Okamoto M, Yoshizumi T, Shimizu M, Nakaminami K, Nishi  
950 R, Ohashi C, Iida K, Tanaka M, et al. 2013. Small open reading frames associated with  
951 morphogenesis are hidden in plant genomes. *Proc Natl Acad Sci U S A* **110**: 2395–2400.
- 952 Hardiman KE, Brewster R, Khan SM, Deo M, Bodmer R. 2002. The bereft gene, a potential target of the  
953 neural selector gene cut, contributes to bristle morphogenesis. *Genetics* **161**: 231–247.
- 954 Heinen TAJ, Staubach F, Häming D, Tautz D. 2009. Emergence of a New Gene from an Intergenic  
955 Region. *Curr Biol* **19**: 1527–1531.
- 956 Hsieh L-C, Lin S-I, Shih AC-C, Chen J-W, Lin W-Y, Tseng C-Y, Li W-H, Chiou T-J. 2009.  
957 Uncovering small RNA-mediated responses to phosphate deficiency in Arabidopsis by deep  
958 sequencing. *Plant Physiol* **151**: 2120–2132.

- 959 Ibarra-Laclette E, Lyons E, Hernández-Guzmán G, Pérez-Torres CA, Carretero-Paulet L, Chang T-H, Lan  
960 T, Welch AJ, Juárez MJA, Simpson J, et al. 2013. Architecture and evolution of a minute plant  
961 genome. *Nature* **498**: 94–98.
- 962 Ivanova N, Dobrin R, Lu R, Kotenko I, Levorse J, DeCoste C, Schafer X, Lun Y, Lemischka IR.  
963 2006. Dissecting self-renewal in stem cells with RNA interference. *Nature* **442**: 533–538.
- 964 Johnson JM, Edwards S, Shoemaker D, Schadt EE. 2005. Dark matter in the genome: evidence  
965 of widespread transcription detected by microarray tiling experiments. *Trends Genet* **21**: 93–  
966 102.
- 967 Karreth FA, Reschke M, Ruocco A, Ng C, Chapuy B, Léopold V, Sjoberg M, Keane TM, Verma  
968 A, Ala U, et al. 2015. The BRAF pseudogene functions as a competitive endogenous RNA  
969 and induces lymphoma in vivo. *Cell* **161**: 319–332.
- 970 Kellis M, Wold B, Snyder MP, Bernstein BE, Kundaje A, Marinov GK, Ward LD, Birney E,  
971 Crawford GE, Dekker J, et al. 2014. Defining functional DNA elements in the human  
972 genome. *Proc Natl Acad Sci U S A* **111**: 6131–6138.
- 973 Kim D, Pertea G, Trapnell C, Pimentel H, Kelley R, Salzberg SL. 2013. TopHat2: accurate  
974 alignment of transcriptomes in the presence of insertions, deletions and gene fusions.  
975 *Genome Biol* **14**: R36.
- 976 Koehler R, Issac H, Cloonan N, Grimmond SM. 2011. The uniqueome: a mappability resource  
977 for short-tag sequencing. *Bioinformatics* **27**: 272–274.
- 978 Kozomara A, Griffiths-Jones S. 2014. miRBase: annotating high confidence microRNAs using  
979 deep sequencing data. *Nucleic Acids Res* **42**: D68–73.
- 980 Krishnakumar V, Hanlon MR, Contrino S, Ferlanti ES, Karamycheva S, Kim M, Rosen BD,  
981 Cheng C-Y, Moreira W, Mock SA, et al. 2015. Araport: the Arabidopsis information portal.  
982 *Nucleic Acids Res* **43**: D1003–9.
- 983 Krueger F, Andrews SR. 2011. Bismark: a flexible aligner and methylation caller for Bisulfite-  
984 Seq applications. *Bioinformatics* **27**: 1571–1572.

- 985 Kuromori T, Wada T, Kamiya A, Yuguchi M, Yokouchi T, Imura Y, Takabe H, Sakurai T,  
986 Akiyama K, Hirayama T, et al. 2006. A trial of phenome analysis using 4000 Ds-insertional  
987 mutants in gene-coding regions of Arabidopsis. *Plant J* **47**: 640–651.
- 988 Lai K-MV, Gong G, Atanasio A, Rojas J, Quispe J, Posca J, White D, Huang M, Fedorova D,  
989 Grant C, et al. 2015. Diverse Phenotypes and Specific Transcription Patterns in Twenty  
990 Mouse Lines with Ablated LincRNAs. *PLoS One* **10**: e0125522.
- 991 Langmead B, Trapnell C, Pop M, Salzberg SL. 2009. Ultrafast and memory-efficient alignment  
992 of short DNA sequences to the human genome. *Genome Biol* **10**: R25.
- 993 Li F, Zheng Q, Vandivier LE, Willmann MR, Chen Y, Gregory BD. 2012a. Regulatory impact of  
994 RNA secondary structure across the Arabidopsis transcriptome. *Plant Cell* **24**: 4346–4359.
- 995 Liu M-J, Seddon AE, Tsai ZT-Y, Major IT, Floer M, Howe GA, Shiu S-H. 2015. Determinants  
996 of nucleosome positioning and their influence on plant gene expression. *Genome Res* **25**:  
997 1182–1195.
- 998 Li W, Cui X, Meng Z, Huang X, Xie Q, Wu H, Jin H, Zhang D, Liang W. 2012b. Transcriptional  
999 regulation of Arabidopsis MIR168a and argonaute1 homeostasis in abscisic acid and abiotic  
1000 stress responses. *Plant Physiol* **158**: 1279–1292.
- 1001 Li WH, Gojobori T, Nei M. 1981. Pseudogenes as a paradigm of neutral evolution. *Nature* **292**:  
1002 237–239.
- 1003 Lloyd J, Meinke D. 2012. A comprehensive dataset of genes with a loss-of-function mutant  
1004 phenotype in Arabidopsis. *Plant Physiol* **158**: 1115–1129.
- 1005 Lloyd JP, Seddon AE, Moghe GD, Simenc MC, Shiu S-H. 2015. Characteristics of Plant  
1006 Essential Genes Allow for within- and between-Species Prediction of Lethal Mutant  
1007 Phenotypes. *Plant Cell* **27**: 2133–2147.
- 1008 Marahrens Y, Panning B, Dausman J, Strauss W, Jaenisch R. 1997. Xist-deficient mice are defective in  
1009 dosage compensation but not spermatogenesis. *Genes Dev* **11**: 156–166.
- 1010 Mattick JS. 2009. The Genetic Signatures of Noncoding RNAs. *PLoS Genet* **5**: e1000459.

- 1011 Mercer TR, Dinger ME, Mattick JS. 2009. Long non-coding RNAs: insights into functions. *Nat*  
1012 *Rev Genet* **10**: 155–159
- 1013 Michael TP, Jackson S. 2013. The First 50 Plant Genomes. *Plant Genome* **6**: 0.
- 1014 Moghe GD, Lehti-Shiu MD, Seddon AE, Yin S, Chen Y, Juntawong P, Brandizzi F, Bailey-  
1015 Serres J, Shiu S-H. 2013. Characteristics and significance of intergenic polyadenylated RNA  
1016 transcription in Arabidopsis. *Plant Physiol* **161**: 210–224.
- 1017 Nagalakshmi U, Wang Z, Waern K, Shou C, Raha D, Gerstein M, Snyder M. 2008. The  
1018 Transcriptional Landscape of the Yeast Genome Defined by RNA Sequencing. *Science* **320**:  
1019 1344–1349.
- 1020 Neander K. 1991. Functions as Selected Effects: The Conceptual Analyst’s Defense. *Philos Sci*  
1021 **58**: 168–184.
- 1022 Ngernprasirtsiri J, Kobayashi H, Akazawa T. 1988. DNA methylation as a mechanism of  
1023 transcriptional regulation in nonphotosynthetic plastids in plant cells. *Proc Natl Acad Sci U*  
1024 *S A* **85**: 4750–4754.
- 1025 Ning S, Wang P, Ye J, Li X, Li R, Zhao Z, Huo X, Wang L, Li F, Li X. 2013. A global map for dissecting  
1026 phenotypic variants in human lincRNAs. *Eur J Hum Genet* **21**: 1128–1133.
- 1027 Niu D-K, Jiang L. 2013. Can ENCODE tell us how much junk DNA we carry in our genome?  
1028 *Biochem Biophys Res Commun* **430**: 1340–1343.
- 1029 Nobuta K, Venu RC, Lu C, Beló A, Vemaraju K, Kulkarni K, Wang W, Pillay M, Green PJ,  
1030 Wang G-L, et al. 2007. An expression atlas of rice mRNAs and small RNAs. *Nat Biotechnol*  
1031 **25**: 473–477.
- 1032 O’Malley RC, Huang S-SC, Song L, Lewsey MG, Bartlett A, Nery JR, Galli M, Gallavotti A,  
1033 Ecker JR. 2016. Cistrome and Epicistrome Features Shape the Regulatory DNA Landscape.  
1034 *Cell* **166**: 1598.
- 1035 Pang KC, Frith MC, Mattick JS. 2006. Rapid evolution of noncoding RNAs: lack of  
1036 conservation does not mean lack of function. *Trends Genet* **22**: 1–5.

- 1037 Pedregosa F, Varoquaux G, Gramfort A, Michel V, Thirion B, Grisel O, Blondel M, Prettenhofer P,  
1038 Weiss R, Dubourg V, et al. 2011. Scikit-learn: Machine Learning in Python. *J Mach Learn Res* **12**:  
1039 2825–2830.
- 1040 Penny GD, Kay GF, Sheardown SA, Rastan S, Brockdorff N. 1996. Requirement for Xist in X  
1041 chromosome inactivation. *Nature* **379**: 131–137.
- 1042 Poliseno L, Salmena L, Zhang J, Carver B, Haveman WJ, Pandolfi PP. 2010. A coding-  
1043 independent function of gene and pseudogene mRNAs regulates tumour biology. *Nature*  
1044 **465**: 1033–1038.
- 1045 Ponting CP, Belgard TG. 2010. Transcribed dark matter: meaning or myth? *Hum Mol Genet* **19**:  
1046 R162–R168.
- 1047 Sauvageau M, Goff LA, Lodato S, Bonev B, Groff AF, Gerhardinger C, Sanchez-Gomez DB,  
1048 Hacısuleyman E, Li E, Spence M, et al. 2013. Multiple knockout mouse models reveal  
1049 lincRNAs are required for life and brain development. *Elife* **2**: e01749.
- 1050 Savage LJ, Imre KM, Hall DA, Last RL. 2013. Analysis of essential Arabidopsis nuclear genes  
1051 encoding plastid-targeted proteins. *PLoS One* **8**: e73291.
- 1052 Schnable JC, Pedersen BS, Subramaniam S, Freeling M. 2011. Dose–Sensitivity, Conserved  
1053 Non-Coding Sequences, and Duplicate Gene Retention Through Multiple Tetraploidies in  
1054 the Grasses. *Front Plant Sci* **2**. <http://dx.doi.org/10.3389/fpls.2011.00002>.
- 1055 Schnable JC, Wang X, Pires JC, Freeling M. 2012. Escape from preferential retention following  
1056 repeated whole genome duplications in plants. *Front Plant Sci* **3**: 94.
- 1057 Schreiber SL, Bernstein BE. 2002. Signaling Network Model of Chromatin. *Cell* **111**: 771–778
- 1058 Shin H, Shin H-S, Chen R, Harrison MJ. 2006. Loss of At4 function impacts phosphate  
1059 distribution between the roots and the shoots during phosphate starvation. *Plant J* **45**: 712–  
1060 726.
- 1061 Sing T, Sander O, Beerenwinkel N, Lengauer T. 2005. ROCr: visualizing classifier performance  
1062 in R. *Bioinformatics* **21**: 3940–3941.

- 1063 Slotkin RK, Keith Slotkin R, Martienssen R. 2007. Transposable elements and the epigenetic  
1064 regulation of the genome. *Nat Rev Genet* **8**: 272–285.
- 1065 Soltis DE, Albert VA, Leebens-Mack J, Bell CD, Paterson AH, Zheng C, Sankoff D,  
1066 Depamphilis CW, Wall PK, Soltis PS. 2009. Polyploidy and angiosperm diversification. *Am*  
1067 *J Bot* **96**: 336–348.
- 1068 Stergachis AB, Haugen E, Shafer A, Fu W, Vernot B, Reynolds A, Raubitschek A, Ziegler S,  
1069 LeProust EM, Akey JM, et al. 2013. Exonic Transcription Factor Binding Directs Codon  
1070 Choice and Affects Protein Evolution. *Science* **342**: 1367–1372.
- 1071 Stolc V, Samanta MP, Tongprasit W, Sethi H, Liang S, Nelson DC, Hegeman A, Nelson C,  
1072 Rancour D, Bednarek S, et al. 2005. Identification of transcribed sequences in *Arabidopsis*  
1073 *thaliana* by using high-resolution genome tiling arrays. *Proc Natl Acad Sci U S A* **102**:  
1074 4453–4458.
- 1075 Strobl C, Boulesteix A-L, Kneib T, Augustin T, Zeileis A. 2008. Conditional variable importance for  
1076 random forests. *BMC Bioinformatics* **9**: 307
- 1077 Struhl K. 2007. Transcriptional noise and the fidelity of initiation by RNA polymerase II. *Nat*  
1078 *Struct Mol Biol* **14**: 103–105.
- 1079 Sullivan AM, Arsovski AA, Lempe J, Bubb KL, Weirauch MT, Sabo PJ, Sandstrom R, Thurman  
1080 RE, Neph S, Reynolds AP, et al. 2014. Mapping and dynamics of regulatory DNA and  
1081 transcription factor networks in *A. thaliana*. *Cell Rep* **8**: 2015–2030.
- 1082 Svensson O, Arvestad L, Lagergren J. 2006. Genome-wide survey for biologically functional  
1083 pseudogenes. *PLoS Comput Biol* **2**: e46.
- 1084 Trapnell C, Williams BA, Pertea G, Mortazavi A, Kwan G, van Baren MJ, Salzberg SL, Wold  
1085 BJ, Pachter L. 2010. Transcript assembly and quantification by RNA-Seq reveals  
1086 unannotated transcripts and isoform switching during cell differentiation. *Nat Biotechnol* **28**:  
1087 511–515.
- 1088 Tsai ZT-Y, Shiu S-H, Tsai H-K. 2015. Contribution of Sequence Motif, Chromatin State, and

- 1089 DNA Structure Features to Predictive Models of Transcription Factor Binding in Yeast.  
1090 *PLoS Comput Biol* **11**: e1004418.
- 1091 Tsai ZT-Y, Lloyd JP, Shiu S-H. 2017. Defining functional, genic regions in the human genome  
1092 through integration of biochemical, evolutionary, and genetic evidence. *Mol Biol Evol* **In**  
1093 **press**
- 1094 Ulitsky I, Shkumatava A, Jan CH, Sive H, Bartel DP. 2011. Conserved function of lincRNAs in  
1095 vertebrate embryonic development despite rapid sequence evolution. *Cell* **147**: 1537–1550.
- 1096 VanBuren R, Bryant D, Edger PP, Tang H, Burgess D, Challabathula D, Spittle K, Hall R, Gu J,  
1097 Lyons E, et al. 2015. Single-molecule sequencing of the desiccation-tolerant grass  
1098 *Oropetium thomaeum*. *Nature* **527**: 508–511.
- 1099 Wang Z, Zang C, Rosenfeld JA, Schones DE, Barski A, Cuddapah S, Cui K, Roh T-Y, Peng W,  
1100 Zhang MQ, et al. 2008. Combinatorial patterns of histone acetylations and methylations in  
1101 the human genome. *Nat Genet* **40**: 897–903.
- 1102 Woodhouse MR, Schnable JC, Pedersen BS, Lyons E, Lisch D, Subramaniam S, Freeling M.  
1103 2010. Following Tetraploidy in Maize, a Short Deletion Mechanism Removed Genes  
1104 Preferentially from One of the Two Homeologs. *PLoS Biol* **8**: e1000409.
- 1105 Xu S, Grullon S, Ge K, Peng W. 2014. Spatial clustering for identification of ChIP-enriched  
1106 regions (SICER) to map regions of histone methylation patterns in embryonic stem cells.  
1107 *Methods Mol Biol* **1150**: 97–111.
- 1108 Yamada K, Lim J, Dale JM, Chen H, Shinn P, Palm CJ, Southwick AM, Wu HC, Kim C,  
1109 Nguyen M, et al. 2003. Empirical analysis of transcriptional activity in the Arabidopsis  
1110 genome. *Science* **302**: 842–846.
- 1111 Yang L, Takuno S, Waters ER, Gaut BS. 2011. Lowly expressed genes in *Arabidopsis thaliana*  
1112 bear the signature of possible pseudogenization by promoter degradation. *Mol Biol Evol* **28**:  
1113 1193–1203.
- 1114 Zhang X, Yazaki J, Sundaresan A, Cokus S, Chan SW-L, Chen H, Henderson IR, Shinn P,

- 1115 Pellegrini M, Jacobsen SE, et al. 2006. Genome-wide high-resolution mapping and  
1116 functional analysis of DNA methylation in arabidopsis. *Cell* **126**: 1189–1201.
- 1117 Zhao J, Sun BK, Erwin JA, Song J-J, Lee JT. 2008. Polycomb proteins targeted by a short repeat  
1118 RNA to the mouse X chromosome. *Science* **322**: 750–756.
- 1119 Zhao Y, Li H, Fang S, Kang Y, Wu W, Hao Y, Li Z, Bu D, Sun N, Zhang MQ, et al. 2016.  
1120 NONCODE 2016: an informative and valuable data source of long non-coding RNAs.  
1121 *Nucleic Acids Res* **44**: D203–8.
- 1122 Zou C, Lehti-Shiu MD, Thibaud-Nissen F, Prakash T, Buell CR, Shiu S-H. 2009. Evolutionary  
1123 and expression signatures of pseudogenes in Arabidopsis and rice. *Plant Physiol* **151**: 3–15.
- 1124



1125 **FIGURES**

Figure 1.

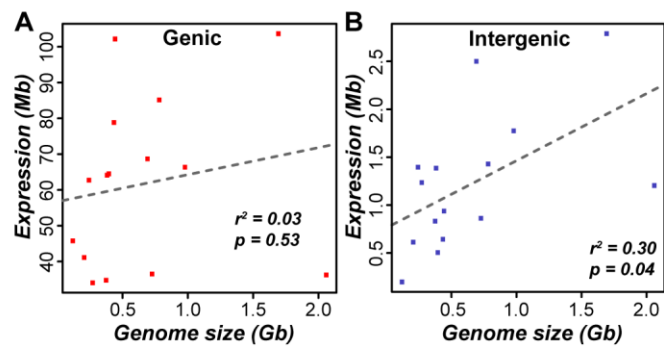

1126

1127

Figure 2.

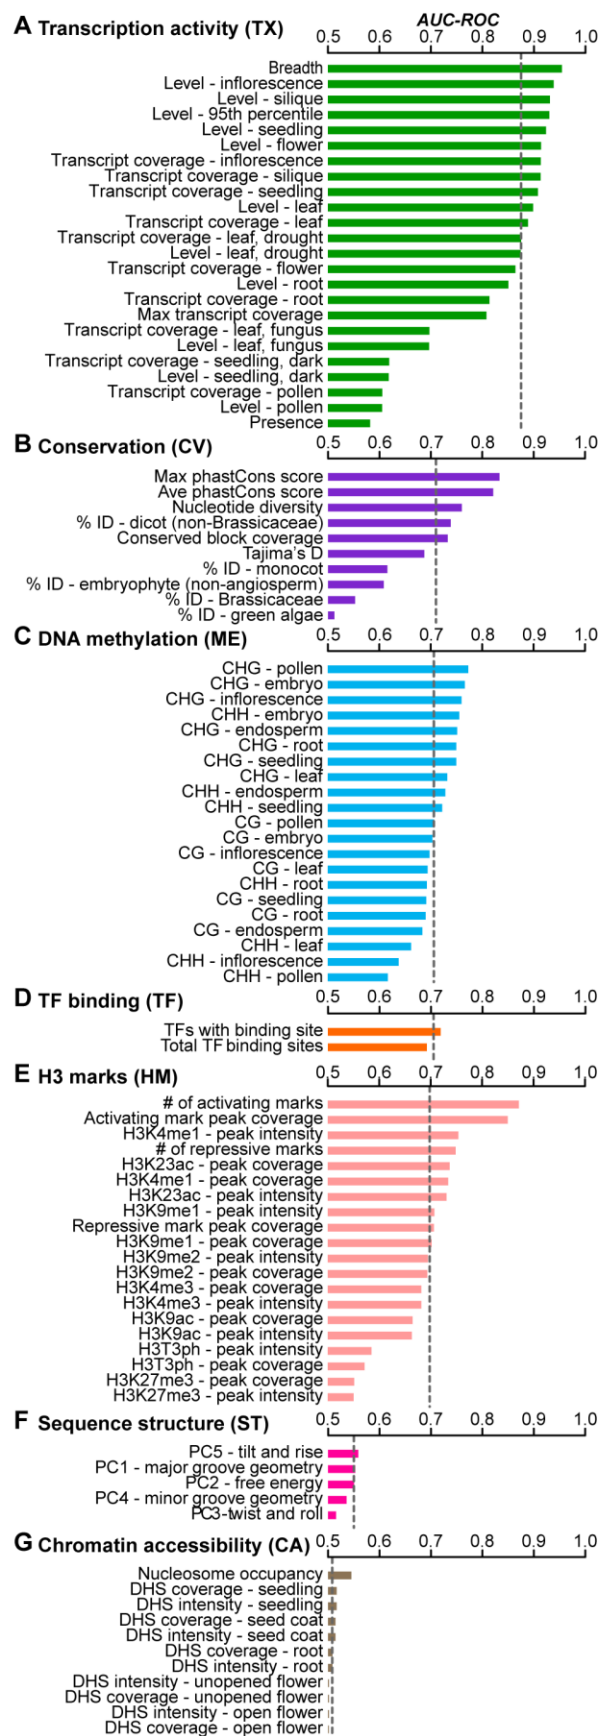

Figure 3.

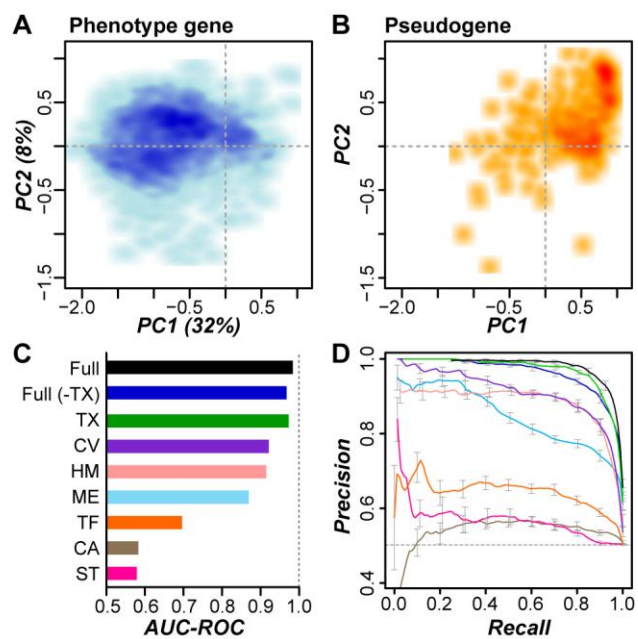

1129

1130

Figure 4.

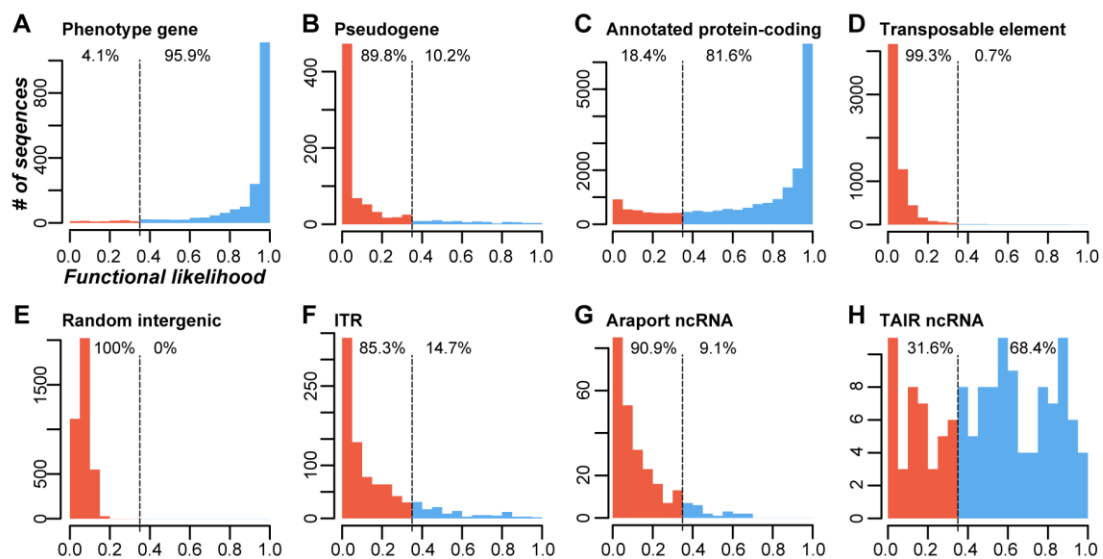

1131

1132

Figure 5.

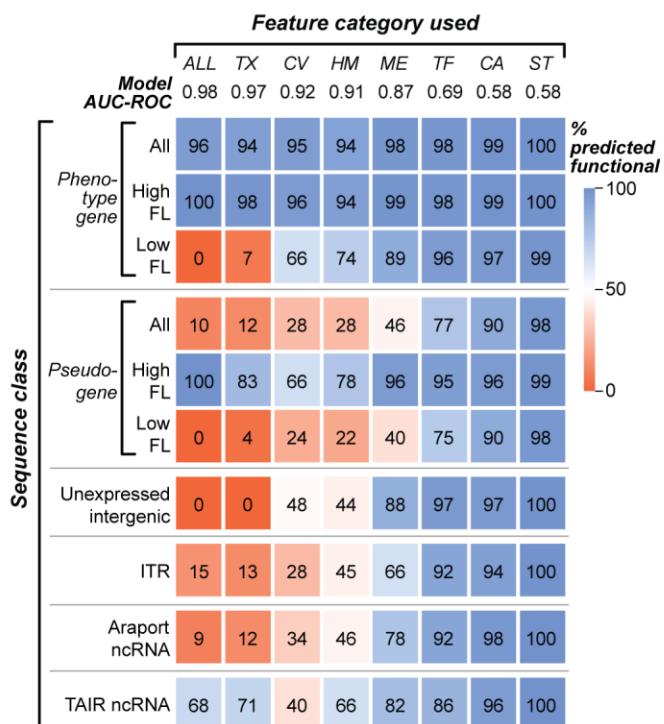

1133

1134

Figure 6.

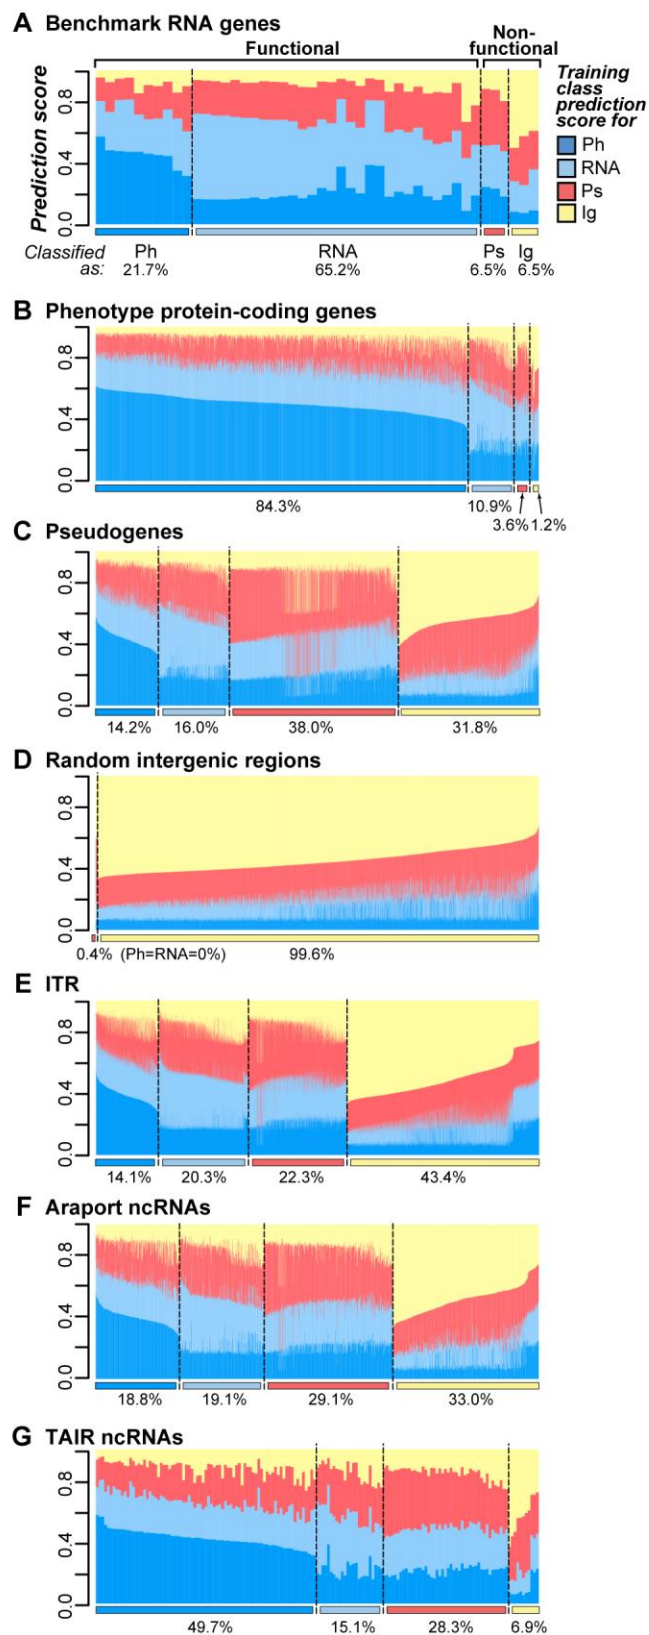

1135

1136

1137 **SUPPLEMENTAL FIGURES**

**Supplemental  
Figure 1.**

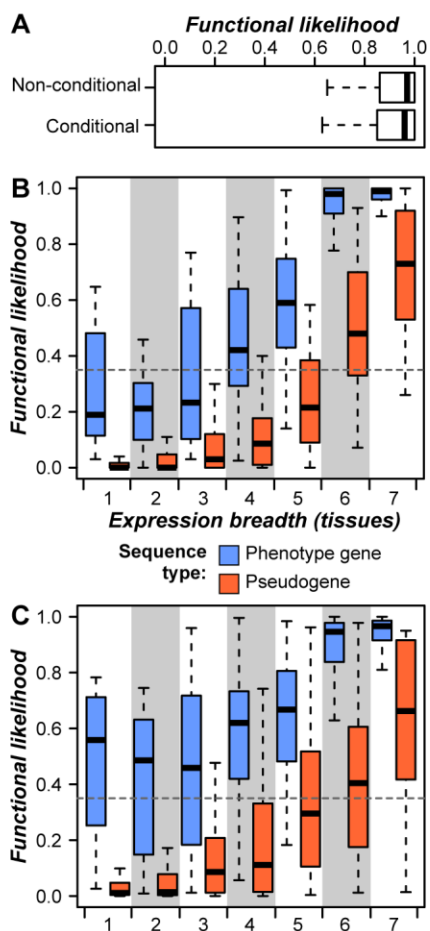

1138

1139

## Supplemental Figure 2.

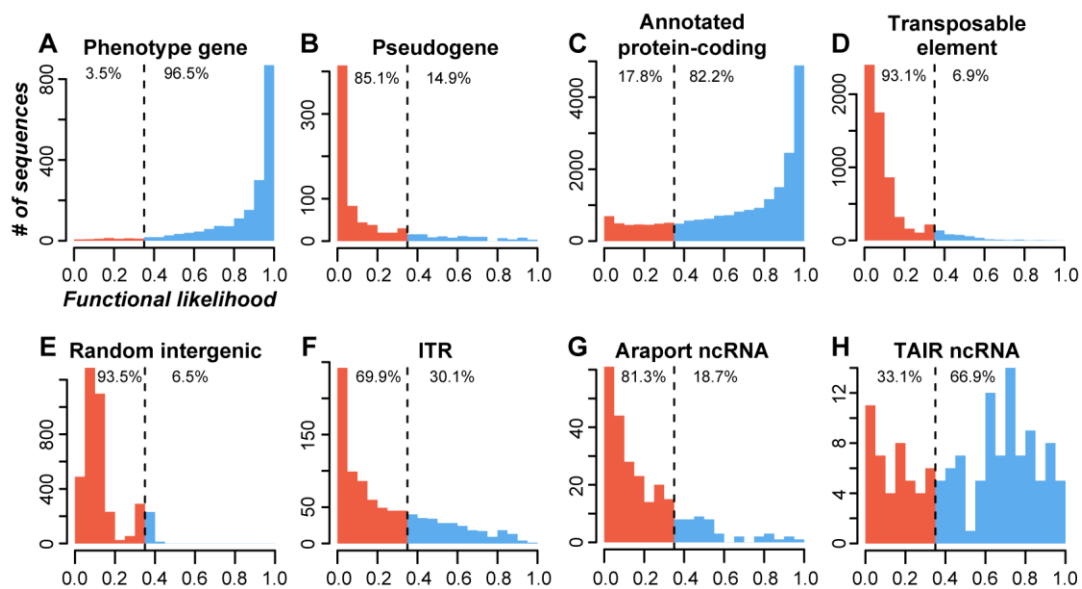

1140

1141



**Supplemental  
Figure 3.**

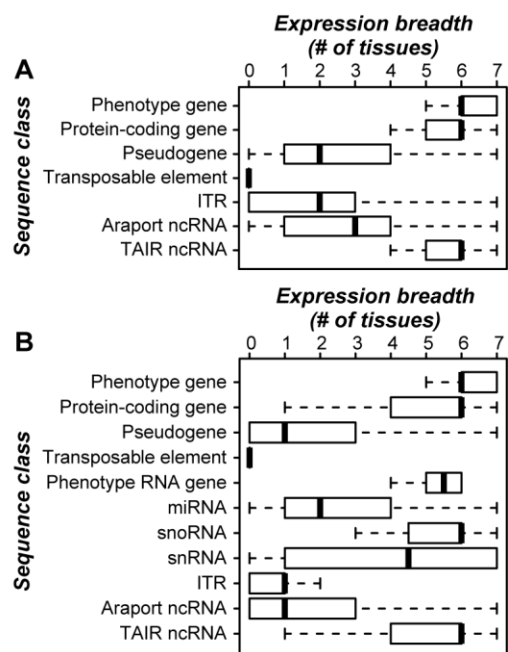

1142

1143

### Supplemental Figure 4.

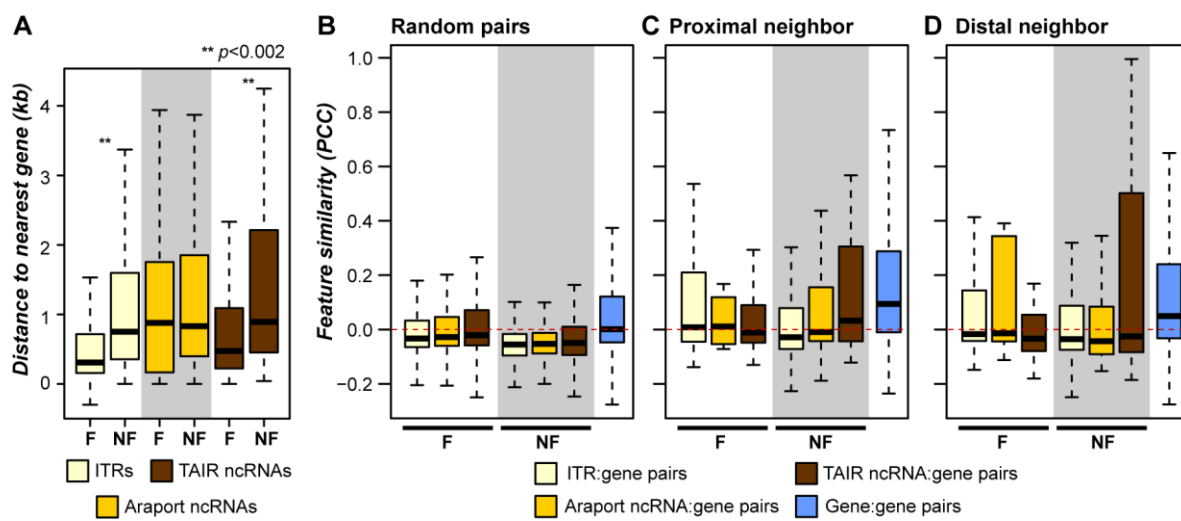

1144

1145

## Supplemental Figure 5.

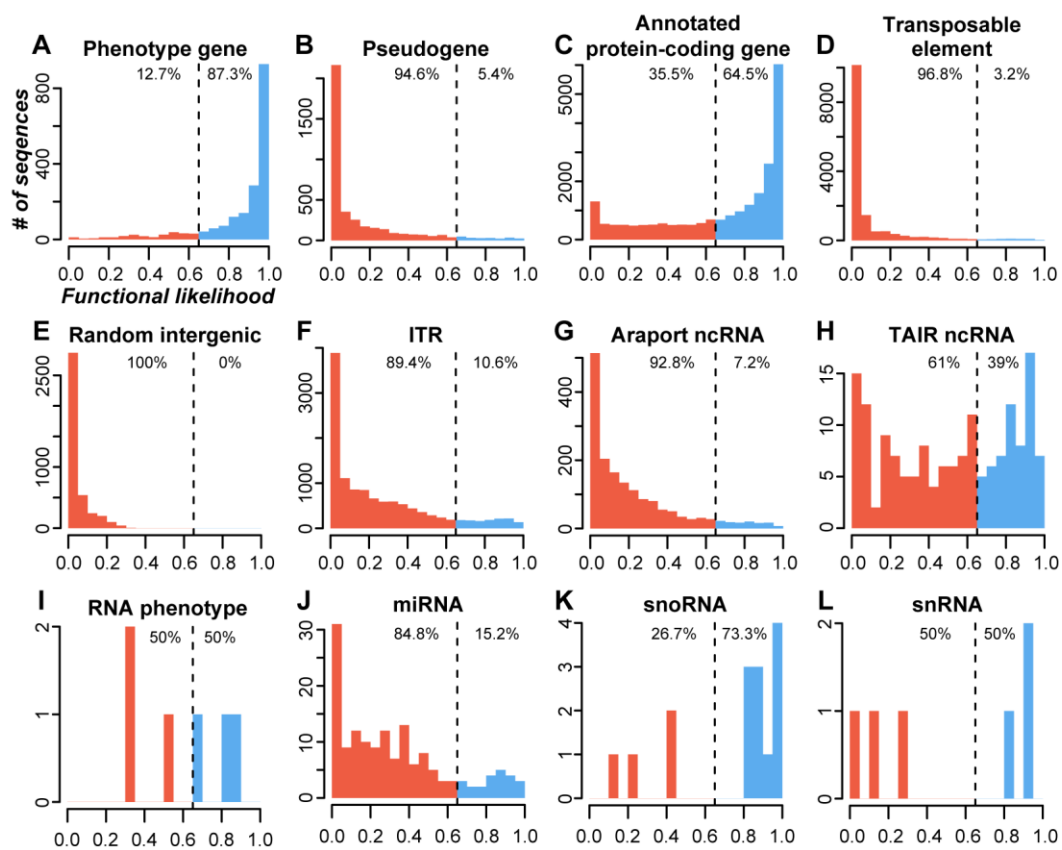

1146

1147
